# Supplementary material for: Intercomparison of four different cascade impactors for fine and ultrafine particle sampling in two European locations
Source: Copernicus journal article supplement (doi:10.5194/acp-2015-1016), 2016-01-19
Supplement: Supplementary file [file acp-2015-1016-AC3-supplement.pdf]

# Intercomparison of four different cascade impactors for fine and ultrafine particle sampling in ~~two European locations~~ indoor and outdoor air

A. S. Fonseca<sup>1,2,\*</sup>, N. Talbot<sup>3,4</sup>, J. Schwarz<sup>3</sup>, J. Ondráček<sup>3</sup>, V. Ždímal<sup>3</sup>, J. Kozáková<sup>3,4</sup>, M. Viana<sup>1</sup>, A. Karanasiou<sup>1</sup>, X. Querol<sup>1</sup>, A. Alastuey<sup>1</sup>, T. V. Vu<sup>5</sup>, J. M. Delgado-Saborit<sup>5</sup>, R. M. Harrison<sup>5,†</sup>

<sup>1</sup> Institute of Environmental Assessment and Water Research (IDÆA-CSIC), Barcelona, 08034, Spain

<sup>2</sup> Universidad de Barcelona, Facultad de Química, Barcelona, 08028, Spain

<sup>3</sup> Institute of Chemical Process Fundamentals of the ASCR, v.v.i. (ICPF), Prague, 165 02, Czech Republic

<sup>4</sup> Charles University in Prague, Faculty of Science, Institute for Environmental Studies, Prague, 128 43, Czech Republic

<sup>5</sup> University of Birmingham, Division of Environmental Health & Risk Management, Birmingham, B15 2TT, UK

<sup>†</sup> Also at: Department of Environmental Sciences / Center of Excellence in Environmental Studies, King Abdulaziz University, PO Box 80203, Jeddah, 21589, Saudi Arabia

\* Correspondence to: A. S. Fonseca (ana.godinho@idaea.csic.es)

## Abstract

Due to the need to better characterise the ultrafine particles fraction and related personal exposure, several impactors have been developed to enable the collection of ultrafine particles (<100 nm). However, to the authors' knowledge there have been no field campaigns to-date intercomparing impactor collection of ultrafine particles. The purpose of this study was two-fold: 1) to assess the performance of a number of conventional and nano-range cascade impactors with regard to the particle mass size distribution under different environmental conditions ~~and aerosol loads and types~~ in indoor and outdoor air, and 2) to characterise aerosol size distributions including ultrafine particles using impactors in 2 European locations. The impactors used were: (i) Berner low-pressure impactor (BLPI; 26 nm - 13.5 µm), (ii) nano-

1 Berner low-pressure impactor (nano-BLPI; 11 nm - 1.95  $\mu$ m) and (iii) Nano-microorifice  
2 uniform deposit impactor (nano-Moudi; 10 nm-18  $\mu$ m), and (iv) Personal cascade impactor  
3 Sioutas (PCIS; < 250 nm - 10  $\mu$ m). Only the BLPI substrates were coated with a thin layer of  
4 vacuum grease, therefore particle bounce that may occur during dry collection should only be  
5 considered for the other impactors.

6 Taking the BLPI as an internal reference, the best agreement regarding mass size distributions  
7 was obtained with the nano-BLPI, independently of the aerosol load and aerosol chemical  
8 composition. The nano-Moudi showed a good agreement for particle sizes >320 nm, whereas  
9 for particle diameters <320 nm this instrument recorded larger mass concentrations in outdoor  
10 air than the internal reference. This difference could be due to particle bounce, to the  
11 dissociation of semi volatiles in the coarser stages and/or to particle shrinkage during  
12 transport through the impactor due to higher temperature inside this impactor. Further  
13 research is needed to understand this behaviour. With regard to the PCIS, their size-resolved  
14 mass concentrations were comparable with other impactors ~~for PM<sub>1</sub>, PM<sub>2</sub> and PM<sub>10</sub>~~, but the  
15 cut-off at 250 nm did not seem to be consistent with that of the internal reference. Chemical  
16 processed linked to aerosol infiltration (e.g., evaporation) were identified in indoor air  
17 samples.

18 **Keywords:** Mass size distribution; Chemical characterization; Ultra-fine particles; Cascade  
19 Impactors; Nanoparticles; Ultrafine particles

## 21 1 Introduction

22 Used in numerous areas of air quality research, cascade impactors are established, relatively  
23 simple, and robust instruments. They collect airborne aerosols and segregate them into a  
24 number of aerodynamic sizes for subsequent determination of mass size distribution, chemical  
25 and/or physical properties (Hitzenberger *et al.*, 2004; Seinfeld and Pandis, 2006). The  
26 mechanical principle behind size impaction employs the known quantities of Stokes number  
27 and slip correction factors to derive particle inertia, therefore ascribing a stopping distance in  
28 accordance to particle size (Hinds, 1999). Particulates are collected onto substrates, frequently  
29 made of quartz, polytetrafluoroethylene (PTFE; best known as Teflon), polyethylene  
30 terephthalate (commonly abbreviated PET, otherwise known as Mylar), polycarbonate or  
31 aluminium (Howell *et al.*, 1998; Schaap *et al.*, 2004; Tursic *et al.*, 2008). The choice of

1 substrate is dependent on the type of impactor, sampling conditions and analytical techniques  
2 intended to be carried out (Fujitani *et al.*, 2006). A variety of cascade impactor designs have  
3 appeared since May (1945) first reported on an initial design to sample coarse aerosols ( $>2.5$   
4  $\mu\text{m}$ ). Since then, sampling size fractions for traditionally designed commercially available  
5 cascade impactors allowed for particle collection from coarse to fine fractions ( $<2.5$   $\mu\text{m}$ ), for  
6 example 10  $\mu\text{m}$  - 0.034  $\mu\text{m}$  for the Berner low-pressure impactor (BLPI) (Hering *et al.*, 1978;  
7 Berner and Luerzer, 1980; Hillamo and Kauppinen, 1991) and size cuts as small as 0.056  $\mu\text{m}$   
8 for the micro-orifice uniform deposit impactor (Moudi) (Marple *et al.*, 1991).

9 However, epidemiological studies have evidenced the need to focus on ultrafine particles  
10 (UFP;  $D_p < 100$  nm), due to their possibly larger impacts on health when compared to coarser  
11 particles (Oberdörster, 2000; Oberdorster *et al.*, 2005). Recently, due to the growing need to  
12 better characterise the UFP fraction, the second generation of Moudi impactors (Model 122  
13 and Model 125 Nano-Moudi-II™, MSP Corp., Shoreview, MN, USA), both available in the  
14 rotating version (122-R and 125-R) and in the non-rotating version (122-NR and 125-NR) and  
15 nano-BLPI (not commercially available) were introduced, both adaptations of the original  
16 Moudi (Marple *et al.*, 1991) and BLPI impactors (Hering *et al.*, 1978; Berner and Luerzer,  
17 1980; Hillamo and Kauppinen, 1991), modified to enable the collection of UFP down to 11  
18 nm. Also, the need to better understand and characterise personal exposure led to the  
19 development of portable, light-weight impactors such as the personal cascade impactor  
20 sampler (PCIS; Misra *et al.*, 2002).

21 Due to the physical principle of particle collection associated with all impactors sampling  
22 artefacts can occur, including particle bounce, particle blow off, and particle wall loss (Wall *et*  
23 *al.*, 1988; Schwarz *et al.*, 2012). These artefacts vary according to the impactor type (Hillamo  
24 and Kauppinen, 1991; Howell *et al.*, 1998; Štefancová *et al.*, 2011) loads, composition of the  
25 aerosol sampled (Huang *et al.*, 2004; Sardar *et al.*, 2005; Fujitani *et al.*, 2006; Crilley *et al.*,  
26 2013), and the type of substrate used (Fujitani *et al.*, 2006; Nie *et al.*, 2010). Also, because  
27 long sampling time is required for having enough mass of the finest UFP for chemical  
28 analysis may produce sampling artefacts of volatilization or absorption.

29 As well as those previously described, the sampling and accurate sizing of UFP/nanoparticles  
30 also present challenges. There is a need to produce a fast flowing jet of air onto an impactor  
31 plate, creating the inertia allowing for collection of the smallest size fractions producing a  
32 high pressure differential at the lowest cut sizes. This pressure drop changes the vapour

1 pressure in the bulk which can then enhance volatilisation (Hering and Cass, 1999). Attempts  
2 to address this issue were successfully carried out by decreasing the pressure drop over a  
3 reduced number of stages (Marple *et al.*, 1991; Štefancová *et al.*, 2011). Moreover, the low  
4 mass of UFP requires a greater collection concentration which then increases the possibility  
5 of mass overloading on the larger fractions. The commercially available Nano-Moudi-  
6 II<sup>TM</sup> seeks to reduce jet velocity, pressure drop, particle bounce, re-entrainment and  
7 evaporative loss by incorporating micro-orifice nozzles (up to 2000 as small as 50  $\mu\text{m}$  in  
8 diameter in the 10 L/min Model 125 and up to 6 000 of 50  $\mu\text{m}$  diameter in the 30 L min<sup>-1</sup>  
9 Model 122). The rotating Nano-Moudi-II<sup>TM</sup> versions (Model 122-R and 125-R) have internal  
10 embedded stepper motors for the rotation of the sampling stages, thereby spreading the  
11 sample over the filter to reduce build-up (Marple *et al.*, 2014). However, as will be described  
12 below, this spreading of the sample may lead to new uncertainties and complications.

13 Cascade impactors have been deployed in a diverse array of measurement campaigns utilising  
14 their versatility, characterising size-fractionated chemical composition of urban aerosols  
15 (Sardar *et al.*, 2005; Schwarz *et al.*, 2012), particle volatility (Hering and Cass, 1999; Huang  
16 *et al.*, 2004), vapour-particle phase partitioning (Delgado-Saborit *et al.*, 2014), influence of  
17 relative humidity (Štefancová *et al.*, 2010), indoor - outdoor relationship (Smolík *et al.*,  
18 2008), archive contamination (Mašková *et al.*, 2015), metals in particles collected near a busy  
19 road (Lin *et al.*, 2005; Karanasiou *et al.*, 2007; Ondráček *et al.*, 2011), size-segregated  
20 emission particles in a coal-fired power station (Tursic *et al.*, 2008), whilst extensive  
21 theoretical investigations and experimental characterization of cascade impactors tended to  
22 focus on the performance of one type of cascade impactor (Biswas and Flagan, 1984; Wang  
23 and John, 1988; Štefancová *et al.*, 2011; Jiménez and Ballester, 2011; Marple *et al.*, 2014).  
24 Howell *et al.* (1998) carried out an intercomparison of ‘traditional’ BLPI and Moudi  
25 impactors during a field campaign. Field campaigns usually provide a greater variation of  
26 conditions than controlled laboratory based conditions, offering a more robust analysis of  
27 comparable instrumentation. Another notable intercomparison study was conducted by  
28 Pennanen *et al.* (2007) who tested a modified 4-stage Harvard high-volume cascade impactor  
29 against a reference 10-stage BLPI in 6 different European locations over different seasons.  
30 The authors note the implicit effects on individual impactors of meteorology and aerosol  
31 composition. Other studies have run two or more impactors in tandem measuring  
32 simultaneously indoors and outdoors (Smolík *et al.*, 2008; Mašková *et al.*, 2015), to cover  
33 extended particle size distributions (Geller *et al.*, 2002), or characterise artefacts caused by

1 particle volatility (Huang *et al.*, 2004; Schaap *et al.*, 2004) or changes in size distribution due  
2 to different relative humidity (Štefancová *et al.*, 2010).

3 To the authors' knowledge there has been no field campaign to-date intercomparing impactor  
4 collection efficiency of UFP. As a result, this paper seeks to address this by assessing the  
5 performance of a number of conventional and nano-range impactors, namely Berner low-  
6 pressure impactor (BLPI, 25/0.018/2, Hauke, Austria), nano-Berner low-pressure impactor  
7 (nano-BLPI, 10/0,01, Hauke, Austria), nano-microorifice uniform deposit impactor (Nano-  
8 Moudi-II™, MSP Corp., Shoreview, MN, USA Model 125R; U.S. Patent # 6,431,014B1) and  
9 Personal cascade impactor Sioutas (Sioutas™ PCIS, SKC Inc.; Misra *et al.*, 2002), by means  
10 of two intercomparison exercises ~~one in Prague, during winter 2015, and other in Barcelona~~  
11 ~~during summer 2015~~ in indoor and outdoor air. The aim of the campaigns was to test the  
12 instruments' performance under different environmental conditions and aerosol loads and  
13 types, with an emphasis on the transport of outdoor aerosols into the indoor air. Our work  
14 reports on the impactor performances not only with regard to different particle size  
15 distributions but also aerosol composition and meteorology.

## 16 **2 Methodology**

### 17 **2.1 Sampling sites and sampling set-up**

#### 18 *2.1.1 Prague*

19 The field intercomparison initially took place in outdoor air (6<sup>th</sup>-23<sup>rd</sup> February 2015) and it  
20 was subsequently moved indoors (23<sup>rd</sup> February 2015 - 2<sup>nd</sup> March 2015) in Prague, Suchdol at  
21 the Institute of Chemical Process Fundamentals (ICPF), Academy of Sciences of the Czech  
22 Republic (ASCR) compound (50°7'36.47"N, 14°23'5.51"E, 277 m.a.s.l). Suchdol is a  
23 residential area in north-western Prague, about 6 km from the city centre. It is recognized as a  
24 suburban background site with residential houses and a university campus interspersed  
25 between plenty of green spaces. The traffic flow is moderate along one major 2-lane road  
26 (average traffic of 10000-15000 vehicles day<sup>-1</sup>) with regular bus services. Due to its location  
27 on a plateau above the river Vltava there are not many contributory roads alongside (Figure  
28 S1 in the supplementary information). Detailed information of the area where the impactors  
29 were located were previously provided by Smolík *et al.* (2008) and Hussein *et al.* (2006).

1 Outdoor sampling consisted of 3 weekend sampling periods (6 - 9<sup>th</sup>, 13 - 16<sup>th</sup> and 20<sup>th</sup> - 23<sup>rd</sup>  
2 February 2015), and 2 week-day samplings, (10 - 12<sup>th</sup> and 17 - 20<sup>st</sup> [February 2015](#)).  
3 In addition, indoor samples were also collected during 2 week-day samplings (23<sup>rd</sup> - 25<sup>th</sup> and  
4 25<sup>th</sup> - 27<sup>th</sup> February 2015) and a final 3-day weekend sampling period (27<sup>th</sup> February 2015 -  
5 2<sup>nd</sup> March 2015). This resulted in a total of 5 valid outdoor samples (three weekend and two  
6 week-day) and two valid indoor samples (one weekend and one week-day). For both outdoor  
7 and indoor sampling, the weekend runs started on the preceding Friday between 11:00h-  
8 13:00h local time and finished at 9:00h local time on the following Monday. The week-day  
9 samplings started between 11h00-14h00 and terminated at 9h00. The sample duration in  
10 Prague was defined based on the experience from previous research (Smolík *et al.*, 2008;  
11 Štefancová *et al.*, 2011). Based on ambient PM concentrations it was considered that samples  
12 should be collected over no more than 72 hours, to avoid substrate overload.

### 13 2.1.2 Barcelona

14 The Barcelona intercomparison was conducted exclusively outdoors at an air quality  
15 monitoring station at IDAEA-CSIC located in an urban background site in the southwest of  
16 Barcelona (41°23'14" N, 02°06'56"E, 78 m.a.s.l) from 18<sup>th</sup> May to 3<sup>rd</sup> July 2015 (Figure S2  
17 [in the supplementary information](#)). The sampling site, described in detail by Reche *et al.*  
18 (2015), is influenced by vehicular emissions from one of the city's main traffic avenues  
19 (Diagonal avenue), located at approximately 200 m from the site and with a mean traffic  
20 density of 90 000 vehicles/-day-~~L-min~~<sup>-1</sup> (Amato *et al.*, 2015). Even though the site is officially  
21 classified as urban background, it is located in a city with very high road traffic and  
22 influenced by the emissions of one of the largest arterial roads of the city.

23 [Outdoor sampling in Barcelona consisted of 4-day \(during week-days\) samples, each of them](#)  
24 [accounting for 96h \(4 consecutive days\). A total of 4 samples \(4-days each\) was collected.](#)  
25 The runs started every Monday between 10:00h-12:00h local time and finished on Fridays  
26 around 14:00h-16:00h local time. The sample duration in Barcelona was set longer than in  
27 Prague since the averages of particle mass collected during a sampling less than 4 days would  
28 not be sufficient for further chemical analysis. Indoor intercomparisons were not carried out  
29 due to the absence of an appropriate location for indoor air sampling.

## 2.2 Instrument set-up and experimental specifications

In the present study, the mass size distribution of the aerosol was measured by different types of cascade impactors:

- A Berner low-pressure impactor (BLPI, 25/0.018/2, Hauke, Austria; (Berner et al., 1979; Preining and Berner, 1979) which collects particles onto PET foils (Mylar 13  $\mu\text{m}$  thick) (flow rate 24.8 L  $\text{min}^{-1}$ ). The impactors separated particle mass into 10 size fractions. The cut diameters of the stages were 0.026, 0.056, 0.1, 0.16, 0.25, 0.43, 0.86, 1.73, 3.425, and 6.61  $\mu\text{m}$  (Štefancová *et al.*, 2011). The impactors were equipped with inlets with the cut-point calculated as 14  $\mu\text{m}$ .
- A modified BLPI (denominated as nano-BLPI, 10/0.01, Hauke, Austria) collecting particles on PET foils (Mylar 13  $\mu\text{m}$  thick) (flow rate 17.2 L  $\text{min}^{-1}$ ) from 0.01  $\mu\text{m}$  to 1.95  $\mu\text{m}$  in 8 size stages. The aerodynamic cut diameters of stages 1 to 8 were 0.011, 0.024, 0.039, 0.062, 0.095, 0.24, 0.49, 1.0  $\mu\text{m}$ , and the inlet cut-point was calculated as 1.95  $\mu\text{m}$ . Given that the nano-BLPI is a custom made instrument, the design parameters of each of its impactation stages are shown in Table S1 in the [supplementary supporting information](#).
- A nano-microorifice uniform deposit area impactor (Nano-Moudi-II™, MSP Corp., Shoreview, MN, USA Model 125R; U.S. Patent # 6,431,014B1) equipped with PTFE filters (with diameters of 47 mm, [0.5  \$\mu\text{m}\$  pore and 0.14 mm thick](#)) was used to collect size-resolved aerosol samples.
- This impactor effectively separated the particulate matter into 13 stages with nominal cut diameters of 0.010, 0.018, 0.03, 0.06, 0.10, 0.18, 0.32, 0.56, 1.0, 1.8, 3.2, 5.6, 10  $\mu\text{m}$  and the inlet cut-point as 18  $\mu\text{m}$  when operated at an inlet flow rate of 10 L  $\text{min}^{-1}$ .
- Three personal cascade impactor samplers (Sioutas™ PCIS, SKC Inc; Misra *et al.*, 2002) operating with a flow rate of 9 L  $\text{min}^{-1}$  at a pressure drop of 11 inches of  $\text{H}_2\text{O}$  (2.7 kPa). Particles can be separated in the following aerodynamic particle diameter ranges: <0.25; 0.25 to 0.5; 0.5 to 1.0; 1.0 to 2.5; and >2.5  $\mu\text{m}$ . The collection substrates were 37 mm PTFE filters (Pall) [in Prague](#) or quartz fibre filters (Pall) [in Barcelona](#) for the < 0.25  $\mu\text{m}$  [filter stage](#), and 25 mm PTFE filters (Pall) for the 0.25-2.5  $\mu\text{m}$  and >2.5  $\mu\text{m}$  [impactor stages](#). Two of the PCIS deployed in Prague separated particle mass in all of the 5 size fractions while another unit collected particles only at 3 of the stages (< 0.25  $\mu\text{m}$ ; 0.25-2.5  $\mu\text{m}$  and >2.5  $\mu\text{m}$ ). In order to facilitate interpretation of the data, a lower cut diameter of 30 nm was assumed for the last filter stage of particles < 0.25  $\mu\text{m}$  (quasi-UFP).



1 All the cascade impactors were loaded with uncoated substrates to avoid possible  
2 interferences in future chemical analysis (mainly, determination of organics), so the particle  
3 bounce that might occur during dry collection has to be considered excepting for the case of  
4 BLPI which foils were coated with a thin layer of vacuum grease (Apiezon L, Apiezon  
5 products, M&I Materials Ltd, Manchester, England) to ensure adherence of deposited  
6 particles and reduce the artefact of bounce.

7 For the Prague winter intercomparison, the abovementioned six different impactors were  
8 deployed simultaneously in both outdoor and indoor sampling periods. The cascade impactors  
9 and their inlets were positioned outside above the roof of ICPF building, 285 m.a.s.l. The  
10 nano-Moudi, in order to protect its electrical components, was kept inside an air-conditioned  
11 cabin with a temperature continually lower than 20°C and a metal pipe (about 300 cm long)  
12 was extended through the roof of the building. With regard to indoor sampling, the impactors  
13 were placed inside Laboratory of Aerosol Chemistry and Physics experimental hall on the 2<sup>nd</sup>  
14 floor where office and other experimental activities take place. In both campaigns (indoor and  
15 outdoor), the pump exhausts were extended far of the sampling spots in order to avoid  
16 sampling artefacts.

17 For the Barcelona summer intercomparison, the same cascade impactors were deployed  
18 (except for the PCIS) at the urban background monitoring site located in IDAEA-CSIC (78  
19 m.a.s.l; South West part of the city) within the University Campus and they were positioned  
20 under a plastic shelter to protect them from rain while allowing free ventilation. All the  
21 impactor pumps were placed 5 m distance from the impactors whilst long tubes (10 m) were  
22 connected to the exhausts to avoid contamination of the samples.

23 The error in the sampling flow rate and sampled volume in both campaigns was < 5%. Thus,  
24 it is assumed that flow rates did not affect the particle size cut-offs. The uncertainty in the  
25 particle mass concentration determination was < 15% except in some cases for the smallest  
26 stages of nano-BLPI and nano-Moudi impactor which reached mass value deviations > 20 %  
27 (standard deviation).

28 The specifications of the campaigns and the impactors deployed in the intercomparison study  
29 are summarized in Table 1. The BLPI was used as internal reference for the size distribution  
30 in this study as it was calibrated with the method described by Hillamo and Kauppinen (1991)  
31 for the fine stages and by Štefancová *et al.* (2011) for coarse stages. ~~For the intercomparison,~~  
32 ~~the modal pattern of aerosol mass size distribution was divided into four size groups: (i) PM<sub>10</sub>~~



( $D_p < 10 \mu\text{m}$ ), (ii)  $\text{PM}_{2.5}$  ( $D_p < 2.5 \mu\text{m}$ ), (iii)  $\text{PM}_{10}$  ( $D_p < 10 \mu\text{m}$ ) and (iv)  $\text{PM}_{0.25}$  ( $D_p < 0.25 \mu\text{m}$ ) particles. Approximate lower cut points for those selected size fractions are shown in Table S2 in the supplementary information.

Table 1. Impactors deployed in Prague and Barcelona and their specifications.

| Impactor type                                  | BLPI                                                                                       | nano-BLPI                                                                                  | nano-Moudi                                                                                 | PCIS (5 stages) <sup>c</sup>                                                                                                                      | PCIS (3 stages) <sup>d</sup>                                                                                                                            |
|------------------------------------------------|--------------------------------------------------------------------------------------------|--------------------------------------------------------------------------------------------|--------------------------------------------------------------------------------------------|---------------------------------------------------------------------------------------------------------------------------------------------------|---------------------------------------------------------------------------------------------------------------------------------------------------------|
| Number of samplings in Prague                  | 5x outdoor (3x weekend-days + 2x week-days)<br>2 x indoor (1x weekend-days + 1x week-days) | 5x outdoor (3x weekend-days + 2x week-days)<br>2 x indoor (1x weekend-days + 1x week-days) | 5x outdoor (3x weekend-days + 2x week-days)<br>2 x indoor (1x weekend-days + 1x week-days) | 5x outdoor (3x weekend-days + 2x week-days)<br>2 x indoor (1x weekend-days + 1x week-days)                                                        | 5x outdoor (3x weekend-days + 2x week-days)<br>2 x indoor (1x weekend-days + 1x week-days)                                                              |
| Number of samplings in Barcelona               | 4 x outdoor (4 x week-days)                                                                | 4 x outdoor (4 x week-days)                                                                | 4 x outdoor (4 x week-days)                                                                | N/A                                                                                                                                               | N/A                                                                                                                                                     |
| Flow rate ( $\text{L min}^{-1}$ ) <sup>a</sup> | 24.8                                                                                       | 17.2                                                                                       | 10                                                                                         | 9                                                                                                                                                 | 9                                                                                                                                                       |
| Sampling substrates                            | PET (MYLAR) foils 13 $\mu\text{m}$ thick                                                   | PET (MYLAR) foils 13 $\mu\text{m}$ thick                                                   | PTFE 47 mm                                                                                 | 37 mm PTFE filters (Pall) < 0.25 $\mu\text{m}$ stage and 25 mm PTFE filters (Pall) for the 0.25-2.5 $\mu\text{m}$ and 2.5-10 $\mu\text{m}$ stages | 37 mm quartz-fibre filters (Pall) < 0.25 $\mu\text{m}$ stage and 25 mm PTFE filters (Pall) for the 0.25-2.5 $\mu\text{m}$ and >2.5 $\mu\text{m}$ stages |
| N° Stages                                      | 10                                                                                         | 8                                                                                          | 13                                                                                         | 5                                                                                                                                                 | 3                                                                                                                                                       |
| Lower cut sizes ( $\mu\text{m}$ ) <sup>b</sup> | 0.026                                                                                      | 0.011                                                                                      | 0.01                                                                                       | 0.03                                                                                                                                              | 0.03                                                                                                                                                    |
|                                                | 0.056                                                                                      | 0.024                                                                                      | 0.018                                                                                      | 0.25                                                                                                                                              | 0.25                                                                                                                                                    |
|                                                | 0.10                                                                                       | 0.039                                                                                      | 0.032                                                                                      | 0.50                                                                                                                                              | 2.50                                                                                                                                                    |
|                                                | 0.16                                                                                       | 0.062                                                                                      | 0.056                                                                                      | 1.00                                                                                                                                              |                                                                                                                                                         |
|                                                | 0.25                                                                                       | 0.095                                                                                      | 0.10                                                                                       | 2.50                                                                                                                                              |                                                                                                                                                         |
|                                                | 0.43                                                                                       | 0.24                                                                                       | 0.18                                                                                       |                                                                                                                                                   |                                                                                                                                                         |
|                                                | 0.86                                                                                       | 0.49                                                                                       | 0.32                                                                                       |                                                                                                                                                   |                                                                                                                                                         |
|                                                | 1.73                                                                                       | 1.0                                                                                        | 0.56                                                                                       |                                                                                                                                                   |                                                                                                                                                         |
|                                                | 3.42                                                                                       |                                                                                            | 1.00                                                                                       |                                                                                                                                                   |                                                                                                                                                         |
|                                                | 6.61                                                                                       |                                                                                            | 1.80                                                                                       |                                                                                                                                                   |                                                                                                                                                         |
|                                                |                                                                                            |                                                                                            | 3.20                                                                                       |                                                                                                                                                   |                                                                                                                                                         |
|                                                |                                                                                            |                                                                                            | 5.60                                                                                       |                                                                                                                                                   |                                                                                                                                                         |
|                                                |                                                                                            |                                                                                            | 10                                                                                         |                                                                                                                                                   |                                                                                                                                                         |
| Inlet cut-point ( $\mu\text{m}$ )              | 14                                                                                         | 1.95                                                                                       | 18                                                                                         | 10                                                                                                                                                | >2.5                                                                                                                                                    |

<sup>a</sup> Volumetric flow rate at 20°C and ambient pressure

<sup>b</sup> All sizes are aerodynamic equivalent diameters

<sup>c</sup> Two units deployed; A cyclone was installed ahead which cut  $\text{PM}_{10}$

<sup>d</sup> One single unit deployed

N/A – Not available

## 2.3 Sample conservation and gravimetric analysis

Particle mass concentrations on impactor substrates were gravimetrically determined by pre- and post-weighing the Mylar foils and filters (PTFE and quartz fiber) with a Sartorius M5P-000V001 electronic microbalance in Prague and a Mettler MT5 electronic microbalance in

1 Barcelona, both with a  $\pm 1 \mu\text{g}$  sensitivity. Blank samples (1 per sample) were collected per  
2 each impactor type in both intercomparison (Prague and Barcelona) for each of the sampling  
3 periods. The deviation of mass values due to varying conditions was corrected with the help  
4 of the corresponding blanks.

5 All samples were equilibrated for a period of 24 hours before weighing in a temperature and  
6 relative humidity controlled room ( $20.0 \pm 0.2 \text{ }^{\circ}\text{C}$ ;  $45.4 \pm 0.6 \text{ \% RH}$ ). The electrostatic charges  
7 of the filters were removed using an U-shaped electrostatic neutralizer (Haug, type PRX U) in  
8 Prague and a zerostat anti-static instrument (Z108812-1EA, Sigma-Aldrich Co. LLC.) in  
9 Barcelona. Each sample was weighed three times with an accuracy of mass determination of  $\pm$   
10  $2 \mu\text{g}$ . After weighing, the sampled foils and filters were stored in the freezer at  $-18 \text{ }^{\circ}\text{C}$ .

#### 11 **2.4 Ion chromatography analysis**

12 Ion chromatography analysis were only carried out for the Prague samples and for the BLPI,  
13 nano-BLPI and nano-Moudi impactors with the aim to support the interpretation of the  
14 particle mass size distributions data. The PCIS filters were not analysed due to the differences  
15 observed for the finest size fraction with the other impactors, as will be discussed below.

16 The whole nano-Moudi impactor samples were extracted in 7 ml of ultrapure water. In case of  
17 the Berner impactors, approximately 1/3 of each foil with samples from each stage was cut  
18 out and number of aerosol spots on cut piece was calculated. The ratio between cut and total  
19 number of spots at each impactor stage was used to recalculate results to overall ion amount  
20 on each stage. All samples were then extracted with 7 ml of ultrapure water, sonicated for 30  
21 min in ultrasonic bath and shaken for 1 hour using a shaker. The extracts were then analyzed  
22 using a Dionex 5000 system both for cations ( $\text{Na}^+$ ,  $\text{NH}_4^+$ ,  $\text{K}^+$ ,  $\text{Ca}^{2+}$  and  $\text{Mg}^{2+}$ ) and anions  
23 ( $\text{SO}_4^{2-}$ ,  $\text{NO}_3^-$ ,  $\text{Cl}^-$ ) in parallel. An IonPac AS11-HC 2 x 250 mm column was used for anions  
24 using hydroxide eluent, IonPac CS18 2 x 250 mm for cations using methane sulfonic acid  
25 solution as an eluent. Both anion and cation set-up were equipped with electrochemical  
26 suppressors. External calibration was done using NIST traceable calibration solutions.

# 3 Results

## 3.1 Meteorological data and mean aerosol concentrations in outdoor air

Table 2 displays the meteorological data (ambient temperature, relative humidity, ambient pressure and wind speed), the mean and standard deviations ( $\pm\sigma$ ) of aerosol concentrations for Prague and Barcelona and season during sampling with BLPI.

Table 2. Meteorological data and mean daily aerosol concentrations in outdoor air in Prague from 6<sup>th</sup> to 23<sup>rd</sup> February 2015 and in Barcelona from 18<sup>th</sup> May to 3<sup>rd</sup> July 2015.

| Sampling site      | Temperature (°C) |         | Relative humidity (RH, %) |        | Barometric pressure recalculated to sea level (mbar) | Wind Speed (km h <sup>-1</sup> ) | Mean PM <sub>14</sub> <sup>±</sup> (µg m <sup>-3</sup> ) |
|--------------------|------------------|---------|---------------------------|--------|------------------------------------------------------|----------------------------------|----------------------------------------------------------|
|                    | Min              | Max     | Min                       | Max    |                                                      |                                  |                                                          |
| Prague (winter)    | -3.4±2.6         | 3.9±3.3 | 51±15.4                   | 92±2.1 | 1023±9.4                                             | 12.5±6.6                         | 34.6 ± 15.8                                              |
| Barcelona (summer) | 18±3.3           | 26±3.3  | 39±9.9                    | 85±7.1 | 1018±3.1                                             | 12±2.6                           | 15.2 ± 2.1                                               |

During the winter campaign in outdoor air from 6<sup>th</sup> to 23<sup>rd</sup> February 2015 in Prague, the daily maximum average temperature was 3.9±3.3 °C and the minimum average temperature was -3.4±2.6 °C. The relative humidity varied in the range of 51-92% from day to day.

As expected, higher temperatures during summer were monitored in Barcelona from 18<sup>th</sup> May to 3<sup>rd</sup> July 2015 (minimum of 18±3 °C and maximum of 26±3 °C). However, slightly lower RH (minimum of 39±10 % and maximum of 85±7%), similar pressure (1018±3 mbar) and wind speed (12±3 km h<sup>-1</sup>) values were recorded. The results imply that aqueous particles may have been collected on an impaction stage different from the stage where they ought to be collected due to the flow-induced relative humidity changes during the day (Fang *et al.*, 1991; Štefancová *et al.*, 2010). Aqueous particles can shrink due to evaporation caused by pressure drop through the impactor and/or grow due to condensation caused by aerodynamic cooling. Also, a distortion of the size distribution due to ~~bounce-off should not be neglected for Barcelona given that foils were not greased prior to sampling.~~ bounce-off should not be neglected for Barcelona in the nano-BLPI, nano-Moudi and PCIS given that foils were not greased prior to sampling. The same artefact is not expected to occur during winter in Prague (outdoors). This is supported by previous tests from BLPI (authors' unpublished data)

showing no difference between two identical impactors when one of them used greased foils and the other one ungreaed foils in winter conditions.

In Prague, the mean  $PM_{14}$  mass concentration measured outdoors (with BLPI) was  $34.6 \pm 15.8 \mu g m^{-3}$  whilst in Barcelona (with BLPI) it was  $15.2 \pm 2.1 \mu g m^{-3}$  (Table 2), in a similar order of magnitude than as during previous results from agreement with previous results from 2008 winter campaign in ICPF (Schwarz *et al.* 2012;  $PM_{14}=34 \mu g m^{-3}$ ) and of the same order of magnitude as  $PM_{10}$  from aduring a 2014 summer campaign in the monitoring station at IDAEA-CSIC ( $PM_{10}=19.6 \mu g m^{-3}$ ). The reason of higher averages of particle mass concentrations in winter in Prague than in summer in Barcelona are due to higher emissions (mainly due to coal and biomass burning used for residential heating) and meteorological conditions such as the lower mixing heights of the boundary layer or even temperature inversions occurring in Prague (Schwarz *et al.*, 2012).

### 3.2 Average particle mass concentrations per stage for the different impactors

To estimate the cumulative mass concentration for the different size ranges in each of the impactors, the integrated curve of the measured particle mass size distributions was determined by Eq. 1:

$$M_i = M_{i-1} + \int_{D_{pi-1}}^{D_{pi}} \frac{dM}{dlogD_p} \times dlogD_p \quad \text{Eq. (1)}$$

Where,  $M_i$  is the estimated mass concentration for each impactor stage  $i$ ,  $D_{pi-1}$  and  $D_{pi}$  are respectively the lower and upper cut-off diameters of the impactor stage  $i$

The cumulative curves of the particle mass size distributions from Prague (indoor and outdoor) and Barcelona are shown in Figures 1 and 2, respectively.

Results show that the nano-BLPI behaved similarly to the internal reference considered for this work (BLPI), especially for particles larger than 250 nm. Outdoors and indoors, the nano-Moudi was in agreement with the BLPI for particles larger than 320 nm (independent of the aerosol load and type). However, for particles below 320 nm, the particle mass concentration of the nano-Moudi tended to be higher than for the BLPI, especially during winter in Prague. In indoor air, the nano-Moudi cumulative curve of the mass size distributions was closer to the curve obtained for the BLPI impactor.

While in Prague, the nano-Moudi mass size distributions for particles  $>1 \mu m$  were lower than the rest of the impactors, in Barcelona, this trend was not so evident (Figure 1 and 2). This

different behaviour could be ascribed to a number of causes: (a) in outdoor air the effect of particle bounce and/or the shrinkage of semi volatile compounds may have caused a shift in particle mass towards the lower sizes of the nano-Moudi, especially in winter in Prague resulting in higher concentrations for particles below 320 nm; and/or (b) indoors, the mechanism of the nano-Moudi of spreading the sample (rotating plates) and also the heat generated from the sensor board of nano-Moudi, with the increase in temperature, both in indoor air and inside the nano-Moudi ~~shell~~cabinet, could favour particle dissociation/evaporation from the PTFE filters and thus result in lower mass loads across the lower size ranges, and thus the nano-Moudi curve would appear to be closer to the internal reference BLPI. This effect would not be so prominent in outdoor air, given that the instrument does not reach such temperature increments since it was kept inside an air-conditioned cabin with a temperature continually lower than 20°C while indoors, the temperature was continually higher than 23°C. For one sampling exercise outdoors, in Prague, the instrument's temperature shown on nano-Moudi cabinet's screen increased from 18.8 °C up to 26.6 °C after 4 hours sampling, and then increased up to 31.6 °C at the end of one of the sampling periods (3 days sampling; 72h). The temperature increase (both indoors and outdoors) was significant and able to explain dissociation of ammonium nitrate which increases progressively with increasing temperature (Allen *et al.*, 1989; Stelson and Seinfeld, 1982; Talbot *et al.*, 2016). Ammonium chloride is known to behave similarly (Pio and Harrison, 1987a,b; Allen *et al.*, 1989). Nie *et al.* (2010) also attributed the loss of volatile compounds to the increase of the temperature inside the MOUDI.— However, nitrate concentrations were low in indoor air (see sections below), and therefore the volatilization of this species would have had a low impact on particle mass (leaving only the organic fraction to account for this). Further research is necessary to clarify the different behaviours observed.

~~The size-fractionated average mass concentrations ( $PM_{0.25}$ ,  $PM_1$ ,  $PM_2$  and  $PM_{10}$ ) collected by each impactor along with standard errors deviation ( $\pm\sigma$ ) in the respective size fractions, using data from a total of 5 experiments outdoors and 2 indoors in Prague, and a total of 4 valid samples outdoors in Barcelona are summarised in Figure 3. Approximate cut points for the selected size fractions are shown in Table S2 in the supporting information. However, it is important to take into account that some differences in the results could be partially attributed to the differences in the real cut points for the selected size fractions.~~

The average  $PM_{14}$  mass concentrations and corresponding standard deviation obtained using the internal reference (BLPI) in Prague outdoors were  $34.6 \pm 15.8 \mu g m^{-3}$ . In Barcelona, the  $PM_{14}$  mass concentrations and standard deviation in summer were  $15.2 \pm 2.1 \mu g m^{-3}$ . Comparison of independent data from Grimm laser spectrometer (corrected with high volume samplingsampler) and the impactors with  $PM_1$  and  $PM_{10}$  size cuts, was carried out for the outdoor campaign in Barcelona (4 samples). A slope of 0.98 and a  $R^2$  of 0.7 was obtained for the  $PM_{14}$  for BLPI with  $PM_{10}$  from an online laser spectrometer (corrected with regard to reference instrumentation) whereas for  $PM_1$ , a slope of 0.7 and a better fit of the data was obtained ( $R^2=0.9$ ). Similarly to BLPI, the nano-BLPI shows a slope of 0.7 and a  $R^2$  of 1 for the cut point  $PM_1$ . The mass differences detected for  $PM_1$  suggest that impactors sampling artefacts such as particle blow off, particle wall losses and/or particle bounce occurred.

Finally, the portable PCIS were only used in Prague during winter given the differences obtained with regard to the BLPI for the quasi-ultrafine size mode ( $<250 nm$ ;  $PM_{0.25}$ ). A similar pattern was observed for indoor air, although with a relatively smaller difference. A possible reason for the discrepancies observed regarding the  $PM_{0.25}$  fraction could be ascribed to the different pressure drops across the impactor stages originating from different flow rates (e.g., PCIS  $9 L min^{-1}$  vs. BLPI  $24.8 L min^{-1}$ ). The higher pressure drop in the stationary impactors (e.g., BLPI) may increase the probability of volatilisation of semi-volatile species during prolonged sampling, and could contribute to an underestimation of the  $PM_{0.25}$  when compared to the PCIS (Sioutas, 2004).

The differences with regard to the coarse fractions were much smaller when compared to the quasi-UFP fractions. In outdoor air, the PCIS showed consistently higher concentrations for particles larger than  $1 \mu m$ . Similar results were reported by Sioutas (2004) where an average ratio PCIS to Moudi (Model 110, MSP Corp, Minneapolis, MN) of  $2.02 (\pm 0.59)$  and  $1.21 (\pm 0.35)$  was reported for an aerodynamic size range  $< 0.25 \mu m$  and  $2.5-1 \mu m$ , respectively. However, in indoor air a consistently underestimation, was observed for an aerodynamic size range  $1-10 \mu m$ .

In summary, for the aerosols and sampling conditions in this work, the PCIS provided comparable size-resolved mass concentrations for particles  $> 1 \mu m$  while the cut-off at  $250 nm$  did not seem to be consistent with the internal reference BLPI. In order to fully understand these phenomena, a more systematic evaluation might be required. For this reason, data from PCIS will not be discussed in the following sections.

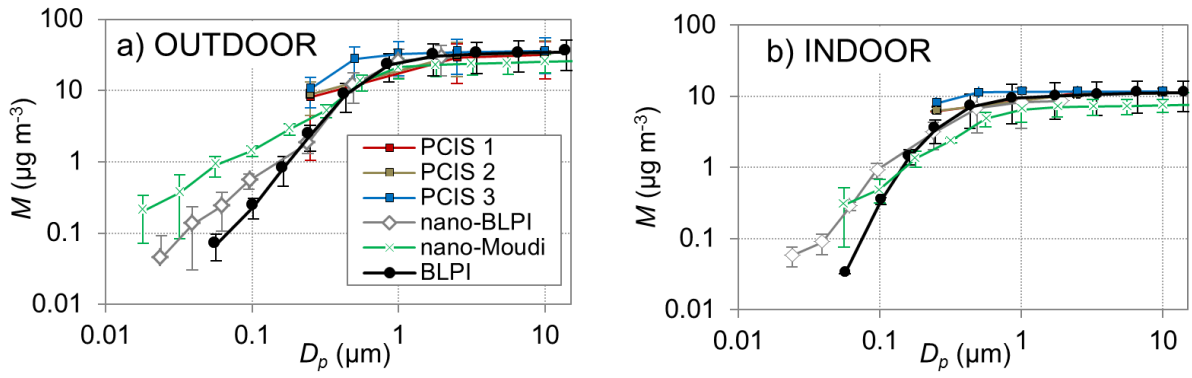

Figure 1. Cumulative mass concentrations measured by the six impactors in Prague: (a) outdoors and (b) indoors. Error bars indicate the standard deviation ( $\pm\sigma$ ).

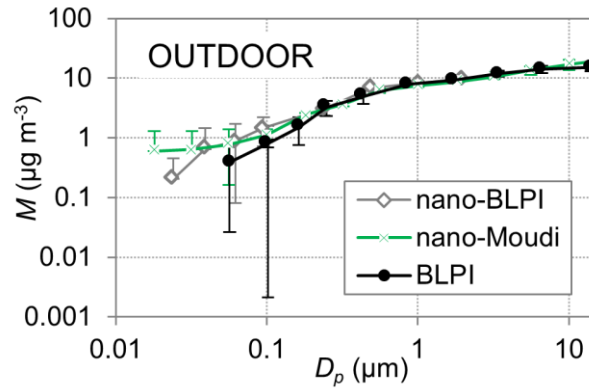

Figure 2. Cumulative mass concentrations measured by the three impactors in Barcelona, outdoors. Error bars indicate the standard deviation ( $\pm\sigma$ ).

~~As shown in Figure 3, the largest relative difference between the average mass concentrations collected with the three impactors (PCIS, nano-BLPI and nano-Moudi) and the internal reference (BLPI) was calculated for the  $PM_{0.25}$ -size fraction measured outdoors in Prague by PCIS and nano-Moudi, when concentrations were larger by 354 and 126 %, respectively. The best agreement between the three impactors and the internal reference was obtained in the Barcelona-summer-campaign.~~

~~Interecomparisons between the nano-BLPI impactor and the reference BLPI indicate an overall good agreement with absolute differences in mass concentrations per size fraction being  $<30\%$ , independent of the aerosol type. A consistent underestimation of the particle mass concentrations for the  $PM_{0.25}$ -size fractions was obtained with the nano-BLPI for all campaigns and locations (Figure 3). This consistent underestimation was in the order of 5 and 22% outdoors in Barcelona and Prague, respectively, and 10% indoors in Prague, for  $PM_{0.25}$ .~~



1 ~~As for PM<sub>1</sub>, a slight overestimation of mass concentrations with regard to the BLPI was~~  
2 ~~obtained by the nano-BLPI in both sampling campaigns outdoors. The largest deviation in this~~  
3 ~~size fraction was obtained in Prague outdoors (15%) whereas the smallest difference was~~  
4 ~~obtained in Barcelona (5%). Similar to the PM<sub>0.25</sub> fraction, the PM<sub>1</sub> and PM<sub>2</sub> concentrations~~  
5 ~~obtained indoors by the nano-BLPI were lower (12 and 15%, respectively) than those of the~~  
6 ~~BLPI.~~

7 ~~As for the nano-Moudi, it consistently measured lower PM<sub>1</sub> and PM<sub>2</sub> concentrations in all~~  
8 ~~campaigns (max difference obtained indoors for PM<sub>1</sub> = 31% and PM<sub>2</sub> = 30 %). These~~  
9 ~~differences can be explained by the difference in the cut points given that PM<sub>1</sub> and PM<sub>2</sub>~~  
10 ~~fractions from the BLPI are actually 0.86 µm and 1.7 µm, respectively. For quasi-UFP mass~~  
11 ~~concentrations were significantly higher (126%) in Prague outdoors, whereas the~~  
12 ~~disagreement with the BLPI was reduced in Barcelona outdoors (14%). Finally, in indoor air,~~  
13 ~~concentrations registered by the nano-Moudi were lower (30%) than the BLPI, in Prague.~~

14 ~~Finally, the portable PCIS were only used in Prague during winter given the differences~~  
15 ~~obtained with regard to the BLPI for the quasi-ultrafine size mode PM<sub>0.25</sub> (354%). A similar~~  
16 ~~pattern was observed for indoor air, although with a relatively smaller, but still high~~  
17 ~~difference (75%). A possible reason for the discrepancies observed regarding the PM<sub>0.25</sub>~~  
18 ~~fraction could be ascribed to the different pressure drops across the impactor stages~~  
19 ~~originating from different flow rates (e.g., PCIS 9 L min<sup>-1</sup> vs. BLPI 24.8 L min<sup>-1</sup>). The higher~~  
20 ~~pressure drop in the stationary impactors (e.g., BLPI) may increase the probability of~~  
21 ~~volatilisation of semi-volatile species during prolonged sampling, and could contribute to an~~  
22 ~~underestimation of the PM<sub>0.25</sub> when compared to the PCIS (Sioutas, 2004).~~

23 ~~The differences with regard to the coarse fractions were much smaller when compared to the~~  
24 ~~quasi-UFP fractions (<[±42%] and <[±27%] in outdoors and indoors, respectively). In~~  
25 ~~outdoor air, the PCIS showed consistently higher PM<sub>1</sub>, PM<sub>2</sub> and PM<sub>10</sub> concentrations (42, 14~~  
26 ~~and 4%, respectively). Similar results were reported by Sioutas (2004) where an average ratio~~  
27 ~~PCIS to Moudi (Model 110, MSP Corp, Minneapolis, MN) of 2.02 (± 0.59) and 1.21 (± 0.35)~~  
28 ~~was reported for an aerodynamic size range < 0.25 µm and 2.5–10 µm, respectively. However,~~  
29 ~~in indoor air a consistently underestimation (12, 16 and 21 % for PM<sub>1</sub>, PM<sub>2</sub> and PM<sub>10</sub>), was~~  
30 ~~observed.~~

~~In summary, for the aerosols and sampling conditions in this work, the PCIS provided comparable size-resolved mass concentrations for PM<sub>1</sub>, PM<sub>2</sub> and PM<sub>10</sub> while the cut-off at 250 nm did not seem to be consistent with the internal reference BLPI. In order to fully understand these phenomena, a more systematic evaluation might be required. For this reason, data from PCIS will not be discussed in the following sections.~~

### 3.3 Aerosol mass size distributions

#### 3.3.1 Particle size distribution in outdoor air

The average particle mass size distributions obtained in the outdoor intercomparison study (Prague and Barcelona) can be found in Figure 3.

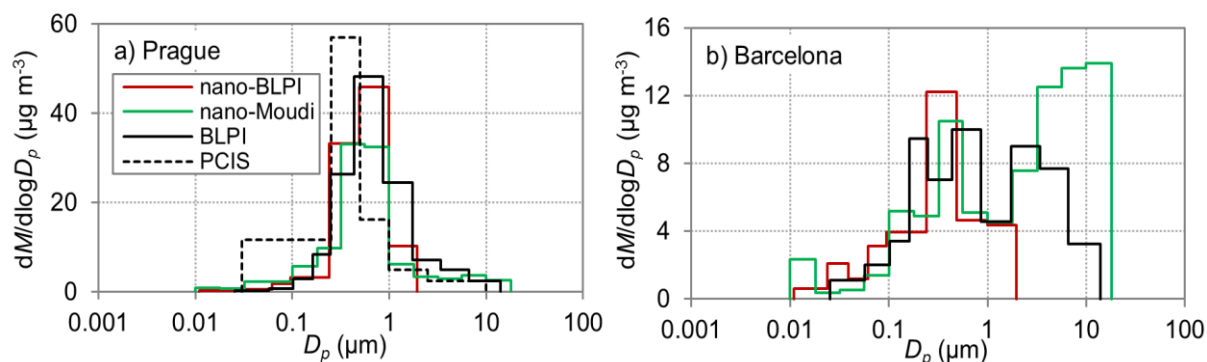

Figure 3. Average mass size distributions obtained outdoors: (a) winter in Prague and (b) summer in Barcelona.

As can be seen, the particle mass size distributions are very different depending on the season and sampling location. During winter in Prague (outdoors), the mass size distributions have a predominantly fine mode, with the coarse mode being almost negligible (by all impactors). The maximum mass concentration obtained in the fine size fraction mode was between 0.4-0.9 µm, whereas in summer in Barcelona, this maximum was shifted towards smaller size fractions between 0.2 and 0.4 µm. In addition to the different aerosol types, this shift to lower sizes might be caused by a lower average relative humidity during sampling in Barcelona that could have caused the particle drying (Tables 2) and therefore, be a reason for particle bounce (Fang *et al.*, 1991; Štefancová *et al.*, 2010). In Prague (outdoors), particle bounce had a negligible effect because high RH was recorded. This is important. In the same time as only few coarse particles were present and at the same time the high share of primary, less oxygenated organics was found (Kubelová *et al.*, 2015; Vodička *et al.*, 2013). Although it is

known that RH is lowered at each stage of any cascade impactor ~~due to kinetic effects and to short time of flight between the nozzle and the impaction plate,~~ this decrease is only moderate for the first stages. For example, the pressure below stage 6 of the BLPI which corresponds to particles as small ~~than~~ as 440 nm is only 6% lower than ambient. A similar value is found for nano-BLPI for equivalent stage. The nano-Moudi has even smaller pressure drops at equivalent stages. The drying becomes important for lower stages, however ~~Indeed, it is known that kinetic effect limiting drying of particles would be more pronounced at lower temperatures in winter due to lower equilibrium water vapor pressure, and drying of particles can occur.~~ In any case, atmospheric particles in this size range below 250 nm are comprised mostly of organics, especially in winter (see e.g. Kubelová *et al.*, 2015). These fractions of organics are often of semiliquid nature and this fact efficiently prevents bounce.

While in Prague during winter the coarse mode was mostly insignificant, in Barcelona during summer the mass size distributions were clearly bimodal, with larger coarse mode concentrations (Figure 3). The coarse mode obtained may be due to mineral and marine aerosol contributions in the study area (Querol *et al.*, 2008).

The majority of mass concentrations were found in the accumulation mode (PM<sub>1</sub>) for both campaigns ( $7.9 \pm 0.7 \mu\text{g m}^{-3}$  and  $22.9 \pm 9.8 \mu\text{g m}^{-3}$  according the internal reference BLPI in summer Barcelona and winter Prague, respectively). With the increase in mass there was an increase in agreement between the impactors, where the closest agreement was observed (between 200-600 nm) (Figure 3).

Figure 3 reveals that the nano-Moudi recorded higher particle mass concentrations in the ultrafine range (<100 nm) than the reference BLPI during winter in Prague (5 samples in total outdoors). Although differences were smaller, the same is true for the Barcelona summer campaign (~~4-week sampling~~ 4 samples in total, Figure 3). As previously mentioned, to protect the electrical components of the nano-Moudi during winter campaign in Prague outdoors, it was kept inside a climate controlled cabin with a temperature continually lower than 20°C. At these temperatures dissociation of ammonium nitrate can still occur at a slow rate (Smolík *et al.*, 2008). In addition, during the sampling, an increase of temperature inside the nano-Moudi ~~shell-cabinet~~ was detected due to the internal mechanism of spreading the sample (rotating plates) and the electric current in the sensor board which generates heat. It is therefore likely that the internal temperature in the nano-Moudi (always >30 °C) was higher than that of the cabin (<20 °C) and thus led to particle volatilisation (Štefancová *et al.*, 2010). The lower

1 nitrate and chloride concentrations in the accumulation mode on the nano-Moudi filters (see  
2 below) would support this interpretation. It is also known that a 5°C difference between the  
3 PTFE filter (of the type used in the nano-Moudi) and sampling temperature may accelerate  
4 the dissociation of ammonium nitrate on PTFE filters up to 20% (Hering and Cass, 1999).  
5 The BLPI and nano-BLPI have no internal warming mechanisms and were located outdoors  
6 in Prague and Barcelona, so it is expected that lower volatilisation would occur in these  
7 scenarios. However, drying of particles before they are deposited on a substrate may happen  
8 also in the BLPI and nano-BLPI due to ~~lower residence time and~~ higher pressure drops (at  
9 equivalent sizes) ~~and despite lower residence times~~ in comparison with the nano-Moudi. This  
10 would increase the driving force for evaporation at those stages, which would encourage  
11 particle shrinkage. However the situation is more complicated while a particle is incorporated  
12 into a deposit of particles where other processes like diffusion in semiliquid mixture of other  
13 organics or Raoult's law play their roles. This process ~~anyhow~~ influences the measured  
14 concentrations and therefore the impactors comparison.  
15 Furthermore, decomposition of ammonium nitrate and chloride, is probably also enhanced in  
16 the nano-Moudi due to the spreading of the sample on the whole filter surface, in comparison  
17 with thick individual spots of material obtained with the BLPI and nano-BLPI impactors. All  
18 these previous facts (temperature, RH, high surface area) appear to enhance the evaporation of  
19 semi-volatiles (and dissociation of ammonium nitrate) and therefore particle shrinkage during  
20 transport through the nano-Moudi explaining the mass size distributions from the nano-Moudi  
21 being skewed towards smaller particle fractions during the Barcelona and Prague campaigns  
22 (Figure 3). Also, the residence time of particles inside the nano-Moudi low pressure stages is  
23 longer due to the lower volumetric flow rate in this instrument. All of this could thus explain  
24 the mass size distributions from the nano-Moudi being skewed towards smaller particle  
25 fractions during the Barcelona and Prague campaigns (Figure 3). It should be stated that the  
26 rotation of the impaction plates and the nozzle plates of the nano-Moudi was specifically  
27 designed to achieve a uniform deposit on the collection substrates and therefore, eradicate the  
28 particle bounce-off artefact (Marple *et al.*, 2014) that may otherwise occur. Particle bounce-  
29 off would only be expected when collecting particles in dry conditions such as in Barcelona  
30 (< 50% RH) (Table 2) or indoors. Finally, the overall internal volumes in the low pressure  
31 stages seem similar in all of the impactors tested; however, this would need experimental  
32 confirmation.

### 1 3.3.2 Particle size distribution in indoor air

2 In Prague, indoor concentrations were lower than outdoors mainly due to a change in weather  
3 conditions resulting in cleaner air masses during sampling periods (Figure 3 and Figure 4).  
4 Reduced penetration efficiency and faster settling times probably explain the lower indoor  
5 coarse mode mass obtained (Figure 4; Hussein *et al.*, 2007). Once again, the nano-BLPI  
6 measured similar mass concentrations to the reference BLPI while the nano-Moudi recorded  
7 notably lower mass from fine to coarse modes. In addition, the nano-Moudi size distribution  
8 showed a slight shift towards larger particle sizes (Figure 4). The difference between the  
9 BLPIs and the nano-Moudi could suggest that the latter underestimated mass during this  
10 campaign for all particle cut sizes. Initially this would appear to reduce the possibility of  
11 volatility losses being responsible for this difference, as ammonium nitrate dissociates readily  
12 indoors thereby causing equal losses to all impactors (Lunden *et al.*, 2003). However, because  
13 of the way the sample is spread across the substrate in the nano-Moudi, as described above,  
14 the ammonium nitrate collected would be more prone to volatilization than that collected on  
15 the other impactors. Therefore it could be considered that the mechanism of the nano-Moudi  
16 of spreading the sample (rotating plates), with the increase in temperatures, both indoors and  
17 inside the nano-Moudi ~~shell~~cabinet, could enhance dissociation/evaporation from the nano-  
18 Moudi PTFE substrates. This conclusion can be supported by Figures 5 and 6, which show  
19 significantly lower mass concentrations of major species of ammonium nitrate with the nano-  
20 Moudi, in comparison with the BLPI.

21 A number of sources of uncertainty in this interpretation should be taken into account:

- 22 a) Increased uncertainty in the mass determination due to lower mass concentrations and  
23 shorter sampling times
- 24 b) No blank correction available for nano-Moudi IC data
- 25 c) No uncertainty calculations for mass determinations available for nano-Moudi,  
26 possibly resulting in negative mass concentrations in the lower stages
- 27 d) Only 2 valid samples available for indoor air (for all impactors)

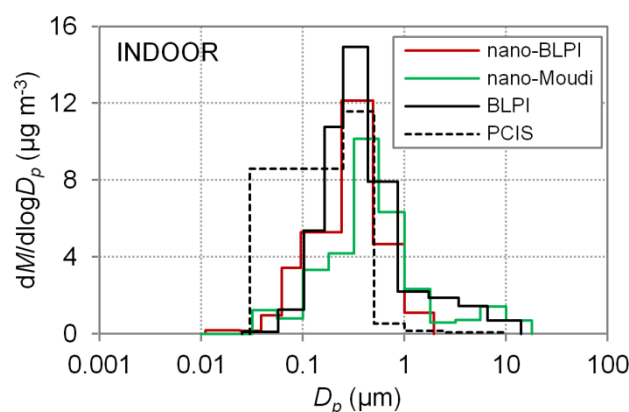

Figure 4. Average mass size distributions in Prague during winter in indoor air.

### 3.3.3 Size distribution of inorganic ions

Figures 5 and 6 show the particle mass size distributions of major ( $\text{SO}_4^{2-}$ ,  $\text{NO}_3^-$  and  $\text{NH}_4^+$ ) and minor ( $\text{Cl}^-$ ,  $\text{Na}^+$ ,  $\text{K}^+$ ,  $\text{Mg}^{2+}$  and  $\text{Ca}^{2+}$ ) aerosol constituents for the winter campaign in Prague in outdoor and indoor air, respectively. Corresponding actual mean values for mass concentrations for all of the ions analyzed for each of the environments (indoor and outdoor) in Prague, are shown in Table S2 of the supplementary information. The uncertainty of the blanks is also included in the Table S2.

In the winter in Prague, the mass size distributions of components have a predominantly fine mode ( $< 1 \mu\text{m}$ ), with the coarse mode being almost negligible in winter in Prague (by all impactors) but highly significant in Barcelona during summer, such as the case for BLPI.

While the fine mode was dominant for the particle mass concentration and all the predominant aerosol constituents ( $\text{SO}_4^{2-}$ ,  $\text{NO}_3^-$  and  $\text{NH}_4^+$ ) for both indoor and outdoor air during winter in Prague, the average mass size distributions for minor species ( $\text{Cl}^-$ ,  $\text{Na}^+$ ,  $\text{K}^+$ ,  $\text{Mg}^{2+}$  and  $\text{Ca}^{2+}$ ), were clearly multimodal (Figures 5 and 6). Similar mass size distributions of these species were obtained by the nano-BLPI and the reference BLPI both outdoors and indoors in Prague. However marked differences in the mass size distributions of these species were observed with the nano-Moudi. In outdoor air there is a clear decrease of  $\text{NO}_3^-$  and  $\text{NH}_4^+$  concentrations measured with the nano-Moudi ( $\text{PM}_{10} = 1.7 \mu\text{g m}^{-3}$ ; Table S2), confirming the interpretations provided in the previous sections. The same is valid for fine chlorides that are missing on same nano-Moudi samples showing ammonium chloride evaporation ( $\text{NH}_4\text{Cl}$ ). Nitrates present indoors (due to indoor ammonium nitrate dissociation; Allen *et al.*, 1989; Stelson and Seinfeld, 1982; Talbot *et al.*, 2016) are influenced by other

1 species different to ammonium salts (e.g. sodium or potassium nitrate) that are not prone to  
2 dissociation. For this reason, the difference between nano-Moudi and the other impactors  
3 indoors (Figure 6) was much smaller compared to outdoors (Figure 5). The lower sulphate  
4 and mass concentration on nano-Moudi indoor samples were caused by other factors (possibly  
5 bounce) given that average RH indoors in winter was low (21%). In addition, outdoors in  
6 Prague, the mass size distributions obtained by the BLPI showed that  $\text{Ca}^{2+}$ ,  $\text{Na}^+$  and  $\text{Mg}^{2+}$   
7 were dominated by coarse modes and for the case of  $\text{K}^+$ , the fine mode is the dominant one  
8 (suggesting biomass combustion as a possible emission source). As for  $\text{Cl}^-$ , the mass size  
9 distributions were clearly bimodal. The nano-Moudi outdoors had different size distributions  
10 from the BLPI for  $\text{Cl}^-$ ,  $\text{Na}^+$ ,  $\text{Ca}^{2+}$  and  $\text{Mg}^{2+}$ . Only for  $\text{K}^+$  the size distribution is similar. Mass  
11 size distributions of  $\text{Cl}^-$  and  $\text{Na}^+$  may have been influenced by filter contamination. The  $\text{Ca}^{2+}$   
12 peak detected at around 100 nm obtained by the nano-BLPI in outdoor air may possibly be  
13 ascribed also to filter contamination, although no specific data are available to support this  
14 interpretation. Similar peaks at 10 and 50 nm were observed indoors with the nano-Moudi and  
15 nano-BLPI which may suggest bounce, contamination or blank variability.



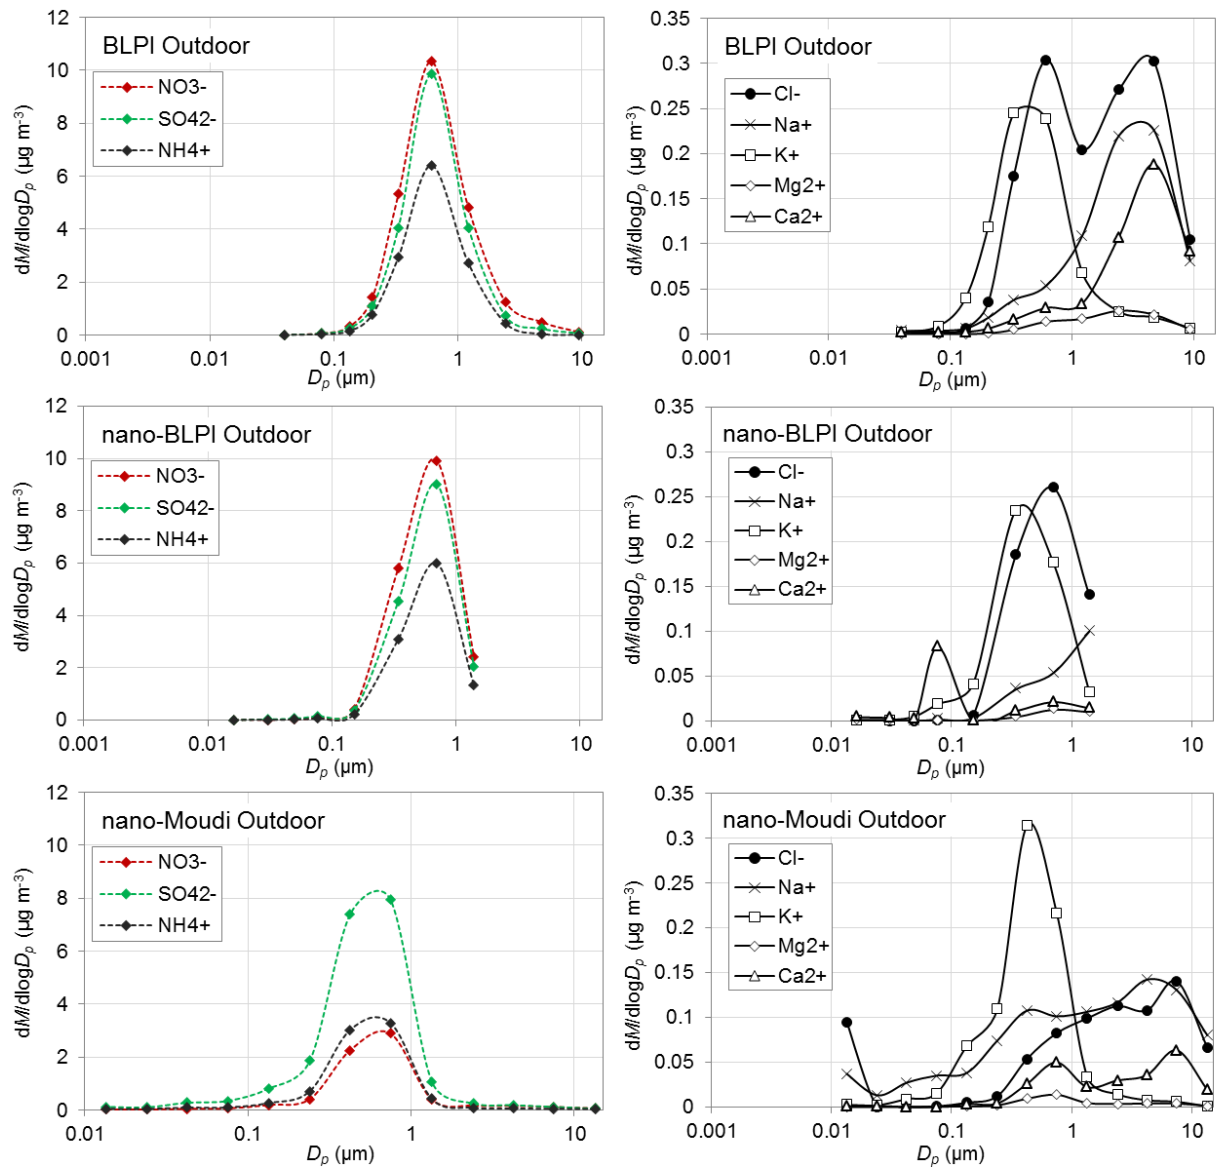

1

2 Figure 5. Average mass size distributions for different ionic species (left:  $\text{SO}_4^{2-}$ ,  $\text{NO}_3^-$  and  
 3  $\text{NH}_4^+$  and right:  $\text{Cl}^-$ ,  $\text{Na}^+$ ,  $\text{K}^+$ ,  $\text{Mg}^{2+}$  and  $\text{Ca}^{2+}$ ) during winter in outdoor air in Prague.

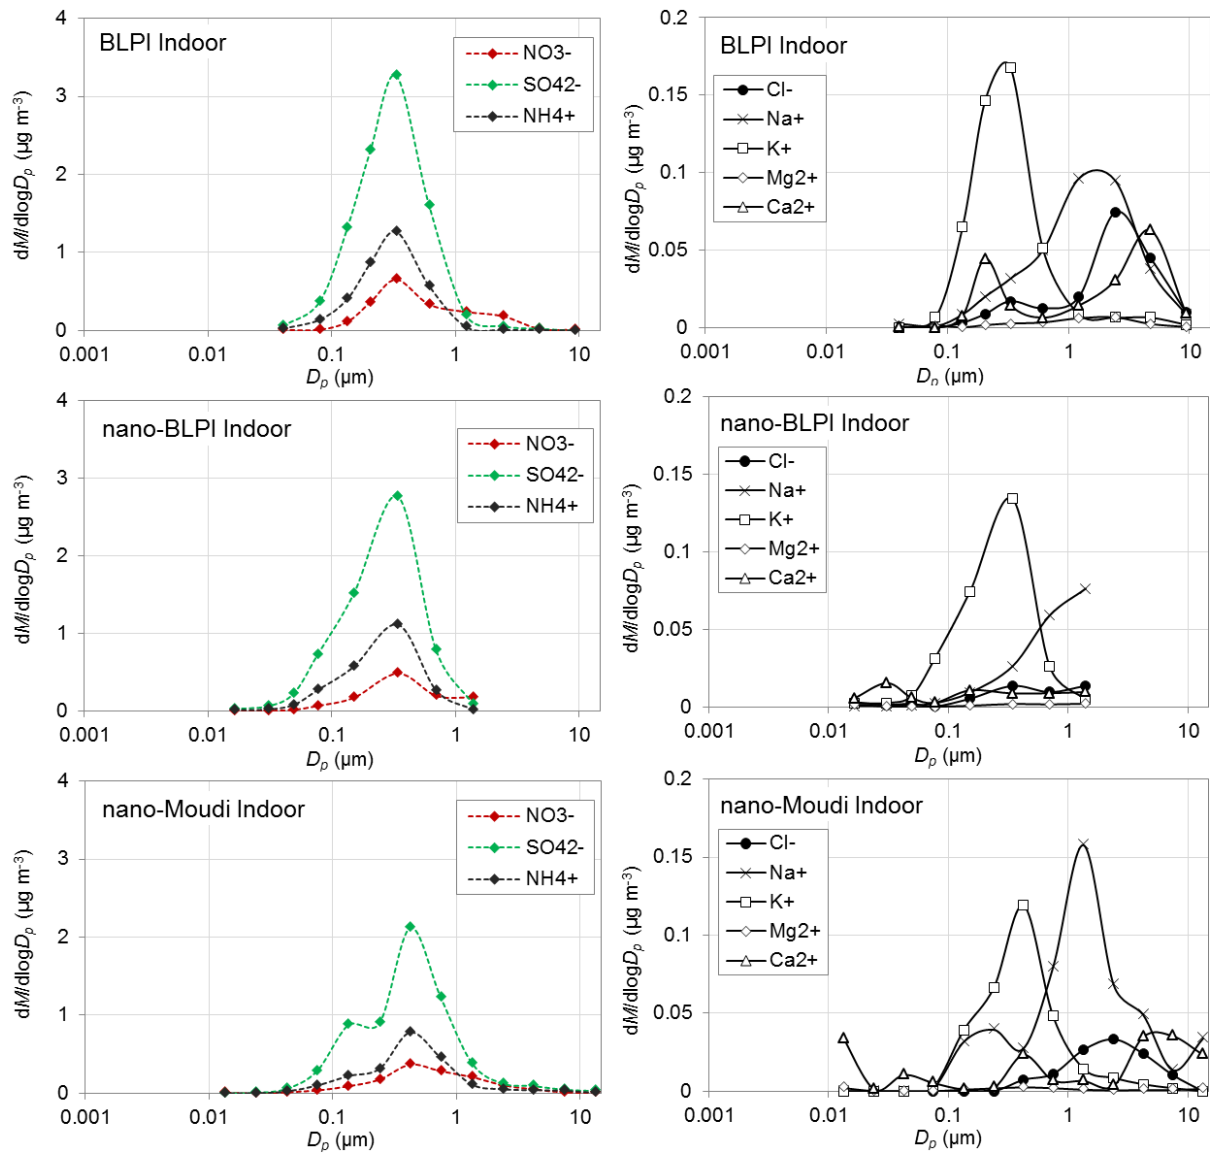

1

2 Figure 6. Average mass size distributions for different ionic species (left:  $SO_4^{2-}$ ,  $NO_3^-$  and  
3  $NH_4^+$  and right:  $Cl^-$ ,  $Na^+$ ,  $K^+$ ,  $Mg^{2+}$  and  $Ca^{2+}$ ) during winter in indoor air in Prague.

#### 4 4 Conclusions

5 This work aimed to assess the performance of four conventional and nano-range impactors,  
6 by means of two intercomparison exercises in Prague, during winter 2015 and in Barcelona  
7 during summer 2015. The aim of the campaigns was to test the instruments' performance with  
8 regard to the particle mass size distributions under different aerosol compositions resulting  
9 from different emission sources, meteorology, seasons, and air mass origins. All the cascade  
10 impactors were loaded with uncoated substrates excepting for the case of BLPI which foils  
11 were coated.

1 Taking the BLPI as an internal reference, the best agreement regarding mass size distributions  
2 was obtained with the nano-BLPI, especially for particles larger than 250 nm. The nano-  
3 Moudi showed a good agreement for particle sizes >320 nm, whereas for particle diameters  
4 <320 nm this instrument recorded larger mass concentrations than the internal reference.  
5 Different particle effects may have caused the differences regarding particle mass  
6 concentrations collected in indoor and outdoor air by the nano-Moudi. Particle volatilisation  
7 may have occurred due to the internal rotating mechanisms and the electric current in the  
8 sensor board of nano-Moudi which heat the impactor casing up. Decomposition of  
9 ammonium nitrate and chloride, as evidenced by the lower nitrate and chloride concentrations  
10 in the accumulation mode, is probably also enhanced in the nano-Moudi due to the spreading  
11 of the sample on the whole filter surface, in comparison with thick individual spots of  
12 material obtained with the BLPI and nano-BLPI impactors. Further research is needed to  
13 clarify this issue. With regard to the PCIS, their size-resolved mass concentrations were  
14 comparable with other impactors ~~for PM<sub>1</sub>, PM<sub>2</sub> and PM<sub>10</sub>~~, but the cut-off at 0.25 µm was not  
15 consistent with that of the internal reference.

16 In Barcelona, the sampling took place under dry conditions (< 50% RH) and thus, particle  
17 bounce would be expected since some particles (depending on composition) could get dry.  
18 Inversely, bounce can be probably neglected for the Prague outdoor intercomparison since the  
19 RH was always >50 % indicating the presence of droplet aerosols that tend to adhere to the  
20 impaction substrate. ~~To avoid such an effect impactor substrates should always be greased~~  
21 ~~especially in areas with low humidity.~~

22 Aerosol mass size distributions were assessed for the Prague and Barcelona campaigns.  
23 During winter in Prague (outdoors), the mass size distributions showed a predominantly fine  
24 mode, with the coarse mode being almost negligible (by all impactors). However, in  
25 Barcelona, the coarse size fractions showed larger mass concentrations, evidencing the higher  
26 influence of mineral and marine aerosols.

27 This study concludes that comparability between the different types of impactors assessed  
28 was dependent on particle size. Different performances when challenged with secondary  
29 aerosols (due to volatilization) with regard to primary aerosols (potential bounce, also  
30 affecting secondary inorganics), whereas observed. Specifically, the influence of the  
31 differences in impactor construction (number of jets, flow, vapour pressure, etc.) on UFP  
32 mass concentrations should be further addressed. In addition, further research is necessary

with regard to the particle processes (evaporation, bounce, etc.) behind the differences in particle mass observed across size fractions in this study.

The conclusions from this work allow us to extract the following recommendations with regard to ultrafine particle sampling with cascade impactors:

- To avoid particle bounce and increase the accuracy of the size cuts, impactor substrates should be greased especially in areas and seasons with low humidity.
- Detailed assessments of the sampling duration should be carried out to allow sufficient collection of material on each stage for adequate quantification without overloading the upper collection stages. Common approaches to avoid particle overloading include using multiple-orifice collection stages, and rotating collection substrates (Marple et al., 2014; Marple et al., 1991).
- Attention should be paid to volatilization issues during aerosol transport inside the impactors especially with regard to temperature increases associated with internal rotating mechanisms and the electric current in the sensor board of nano-Moudi.
- Attention should also be paid to sample storage, to avoid evaporation of already deposited particles that may lead to a decrease of mass on a given stage. This evaporation would modify the observed aerosol size distribution, and would affect all impactor types.

## Acknowledgements

The research leading to these results received funding from the European Community's Seventh Framework Program (FP7-PEOPLE-2012-ITN) no. 315760 (HEXACOMM project). It was also supported by Charles University in Prague, under the project GA UK no. 274213 and the Spanish MINECO, under the frame of SIINN, the ERA-NET for a Safe Implementation of Innovative Nanoscience and Nanotechnology, in the framework of ERANET-SIINN project CERASAFE (id.:16).

## References

- Allen, A.G., Harrison, R.M., Erisman, J.-W. (1989). Field measurements of the dissociation of ammonium nitrate and ammonium chloride aerosols. *Atmospheric Environment* (1967), 23(7), 1591-1599. doi: [http://dx.doi.org/10.1016/0004-6981\(89\)90418-6](http://dx.doi.org/10.1016/0004-6981(89)90418-6)
- Amato, F., Alastuey, A., Karanasiou, A., Lucarelli, F., Nava, S., Calzolari, G., Severi, M., Becagli, S., Gianelle, V.L., Colombi, C., Alves, C., Custódio, D., Nunes, T., Cerqueira, M., Pio, C., Eleftheriadis, K., Diapouli, E., Reche, C., Minguillón, M.C.,

- 1 Manousakas, M., Maggos, T., Vratolis, S., Harrison, R.M., Querol, X. (2015).
- 2 AIRUSE-LIFE+: a harmonized PM speciation and source apportionment in 5
- 3 Southern European cities. *Atmos. Chem. Phys. Discuss.*, 15(17), 23989-24039. doi:
- 4 10.5194/acpd-15-23989-2015
- 5 BcnMap. (2015). Barcelona Map, Ajuntament de Barcelona, from
- 6 [http://w20.bcn.cat/Guiamap/Default\\_en.aspx#x=27601.01&y=83987.71&z=0&w=980](http://w20.bcn.cat/Guiamap/Default_en.aspx#x=27601.01&y=83987.71&z=0&w=980)
- 7 [http://w20.bcn.cat/Guiamap/Default\\_en.aspx#x=27601.01&y=83987.71&z=0&w=980](http://w20.bcn.cat/Guiamap/Default_en.aspx#x=27601.01&y=83987.71&z=0&w=980&h=574&base=GuiaMartorell)
- 8 Berner, A., Luerzer, C. (1980). Mass size distributions of traffic aerosols at Vienna. *The*
- 9 *Journal of Physical Chemistry*, 84(16), 2079-2083. doi: 10.1021/j100453a016
- 10 Berner, A., Lürzer, C., Pohl, F., Preining, O., Wagner, P. (1979). The size distribution of the
- 11 urban aerosol in Vienna. *Science of The Total Environment*, 13(3), 245-261. doi:
- 12 [http://dx.doi.org/10.1016/0048-9697\(79\)90105-0](http://dx.doi.org/10.1016/0048-9697(79)90105-0)
- 13 Biswas, P., Flagan, R.C. (1984). High-velocity inertial impactors. *Environmental Science &*
- 14 *Technology*, 18(8), 611-616. doi: 10.1021/es00126a009
- 15 Crilley, L.R., Ayoko, G.A., Jayaratne, E.R., Salimi, F., Morawska, L. (2013). Aerosol mass
- 16 spectrometric analysis of the chemical composition of non-refractory PM1 samples
- 17 from school environments in Brisbane, Australia. *Science of The Total Environment*,
- 18 458–460, 81-89. doi: <http://dx.doi.org/10.1016/j.scitotenv.2013.04.007>
- 19 Delgado-Saborit, J.M., Stark, C., Harrison, R.M. (2014). Use of a versatile high efficiency
- 20 multiparallel denuder for the sampling of PAHs in ambient air: gas and particle phase
- 21 concentrations, particle size distribution and artifact formation. [Research Support,
- 22 Non-U S Gov't]. *Environ Sci Technol*, 48(1), 499-507.
- 23 Fang, C.P., McMurry, P.H., Marple, V.A., Rubow, K.L. (1991). Effect of Flow-induced
- 24 Relative Humidity Changes on Size Cuts for Sulfuric Acid Droplets in the
- 25 Microorifice Uniform Deposit Impactor (MOUDI). *Aerosol Science and Technology*,
- 26 14(2), 266-277. doi: 10.1080/02786829108959489
- 27 Fujitani, Y., Hasegawa, S., Fushimi, A., Kondo, Y., Tanabe, K., Kobayashi, S., Kobayashi, T.
- 28 (2006). Collection characteristics of low-pressure impactors with various impaction
- 29 substrate materials. *Atmospheric Environment*, 40(18), 3221-3229. doi:
- 30 <http://dx.doi.org/10.1016/j.atmosenv.2006.02.001>
- 31 Geller, M.D., Kim, S., Misra, C., Sioutas, C., Olson, B.A., Marple, V.A. (2002). A
- 32 Methodology for Measuring Size-Dependent Chemical Composition of Ultrafine
- 33 Particles. *Aerosol Science and Technology*, 36(6), 748-762. doi:
- 34 10.1080/02786820290038447
- 35 Hering, S., Cass, G. (1999). The Magnitude of Bias in the Measurement of PM<sub>2.5</sub> Arising
- 36 from Volatilization of Particulate Nitrate from Teflon Filters. *Journal of the Air &*
- 37 *Waste Management Association*, 49(6), 725-733. doi:
- 38 10.1080/10473289.1999.10463843
- 39 Hering, S.V., Flagan, R.C., Friedlander, S.K. (1978). Design and evaluation of new low-
- 40 pressure impactor. I. *Environmental Science & Technology*, 12(6), 667-673. doi:
- 41 10.1021/es60142a004
- 42 Hillamo, R.E., Kauppinen, E.I. (1991). On the Performance of the Berner Low Pressure
- 43 Impactor. *Aerosol Science and Technology*, 14(1), 33-47. doi:
- 44 10.1080/02786829108959469
- 45 Hinds, W.C. (1999). *Aerosol technology : properties, behavior, and measurement of airborne*
- 46 *particles*. New York: Wiley.
- 47 Hitzengerger, R., Berner, A., Galambos, Z., Maenhaut, W., Cafmeyer, J., Schwarz, J., Müller,
- 48 K., Spindler, G., Wieprecht, W., Acker, K., Hillamo, R., Mäkelä, T. (2004).
- 49 Intercomparison of methods to measure the mass concentration of the atmospheric

- 1 aerosol during INTERCOMP2000-influence of instrumentation and size cuts.  
2 *Atmospheric Environment*, 38(38), 6467-6476. doi:  
3 <http://dx.doi.org/10.1016/j.atmosenv.2004.08.025>
- 4 Howell, S., Pszenny, A.A.P., Quinn, P., Huebert, B. (1998). A Field Intercomparison of Three  
5 Cascade Impactors. *Aerosol Science and Technology*, 29(6), 475-492. doi:  
6 10.1080/02786829808965585
- 7 Huang, Z., Harrison, R.M., Allen, A.G., James, J.D., Tilling, R.M., Yin, J. (2004). Field  
8 intercomparison of filter pack and impactor sampling for aerosol nitrate, ammonium,  
9 and sulphate at coastal and inland sites. *Atmospheric Research*, 71(3), 215-232. doi:  
10 <http://dx.doi.org/10.1016/j.atmosres.2004.05.002>
- 11 Hussein, T., Glytsos, T., Ondráček, J., Dohányosová, P., Ždímal, V., Hämeri, K., Lazaridis,  
12 M., Smolík, J., Kulmala, M. (2006). Particle size characterization and emission rates  
13 during indoor activities in a house. *Atmospheric Environment*, 40(23), 4285-4307. doi:  
14 <http://dx.doi.org/10.1016/j.atmosenv.2006.03.053>
- 15 Hussein, T., Kukkonen, J., Korhonen, H., Pohjola, M., Pirjola, L., Wraith, D., Härkönen, J.,  
16 Teinilä, K., Koponen, I.K., Karppinen, A., Hillamo, R., Kulmala, M. (2007).  
17 Evaluation and modeling of the size fractionated aerosol particle number  
18 concentration measurements nearby a major road in Helsinki &ndash; Part II: Aerosol  
19 measurements within the SAPPHIRE project. *Atmos. Chem. Phys.*, 7(15), 4081-4094.  
20 doi: 10.5194/acp-7-4081-2007
- 21 IPR. (2015). Geoportal Praha, Prague geographic data in one place, Prague Institute of  
22 Planning and Development (IPR Praha), from [http://www.geoportalpraha.cz/en/maps-](http://www.geoportalpraha.cz/en/maps-online#.VIIWWLerR1s)  
23 [online#.VIIWWLerR1s](http://www.geoportalpraha.cz/en/maps-online#.VIIWWLerR1s)
- 24 Jiménez, S., Ballester, J. (2011). Use of a Berner Low-Pressure Impactor at Low Inlet  
25 Pressures. Application to the Study of Aerosols and Vapors at High Temperature.  
26 *Aerosol Science and Technology*, 45(7), 861-871. doi:  
27 10.1080/02786826.2011.566900
- 28 Karanasiou, A.A., Sitaras, I.E., Siskos, P.A., Eleftheriadis, K. (2007). Size distribution and  
29 sources of trace metals and n-alkanes in the Athens urban aerosol during summer.  
30 *Atmospheric Environment*, 41(11), 2368-2381. doi:  
31 <http://dx.doi.org/10.1016/j.atmosenv.2006.11.006>
- 32 Kubelová, L., Vodička, P., Schwarz, J., Cusack, M., Makeš, O., Ondráček, J., Ždímal, V.  
33 (2015). A study of summer and winter highly time-resolved submicron aerosol  
34 composition measured at a suburban site in Prague. *Atmospheric Environment*, 118,  
35 45-57. doi: <http://dx.doi.org/10.1016/j.atmosenv.2015.07.030>
- 36 Lin, C.-C., Chen, S.-J., Huang, K.-L., Hwang, W.-I., Chang-Chien, G.-P., Lin, W.-Y. (2005).  
37 Characteristics of Metals in Nano/Ultrafine/Fine/Coarse Particles Collected Beside a  
38 Heavily Trafficked Road. *Environmental Science & Technology*, 39(21), 8113-8122.  
39 doi: 10.1021/es048182a
- 40 Lunden, M.M., Revzan, K.L., Fischer, M.L., Thatcher, T.L., Littlejohn, D., Hering, S.V.,  
41 Brown, N.J. (2003). The transformation of outdoor ammonium nitrate aerosols in the  
42 indoor environment. *Atmospheric Environment*, 37(39-40), 5633-5644. doi:  
43 <http://dx.doi.org/10.1016/j.atmosenv.2003.09.035>
- 44 Marple, V., Olson, B., Romay, F., Hudak, G., Geerts, S.M., Lundgren, D. (2014). Second  
45 Generation Micro-Orifice Uniform Deposit Impactor, 120 MOUDI-II: Design,  
46 Evaluation, and Application to Long-Term Ambient Sampling. *Aerosol Science and*  
47 *Technology*, 48(4), 427-433. doi: 10.1080/02786826.2014.884274



- 1 Marple, V.A., Rubow, K.L., Behm, S.M. (1991). A Microorifice Uniform Deposit Impactor  
2 (MOUDI): Description, Calibration, and Use. *Aerosol Science and Technology*, 14(4),  
3 434-446. doi: 10.1080/02786829108959504
- 4 Mašková, L., Smolík, J., Vodička, P. (2015). Characterisation of particulate matter in  
5 different types of archives. *Atmospheric Environment*, 107, 217-224. doi:  
6 <http://dx.doi.org/10.1016/j.atmosenv.2015.02.049>
- 7 May, K.R. (1945). The Cascade Impactor. *Journal of Scientific Instruments*, 22(12), 247.
- 8 Misra, C., Singh, M., Shen, S., Sioutas, C., Hall, P.M. (2002). Development and evaluation of  
9 a personal cascade impactor sampler (PCIS). *Journal of Aerosol Science*, 33(7), 1027-  
10 1047. doi: 10.1016/s0021-8502(02)00055-1
- 11 Nie, W., Wang, T., Gao, X., Pathak, R.K., Wang, X., Gao, R., Zhang, Q., Yang, L., Wang, W.  
12 (2010). Comparison among filter-based, impactor-based and continuous techniques for  
13 measuring atmospheric fine sulfate and nitrate. *Atmospheric Environment*, 44(35),  
14 4396-4403. doi: <http://dx.doi.org/10.1016/j.atmosenv.2010.07.047>
- 15 Oberdörster, G. (2000). Pulmonary effects of inhaled ultrafine particles. *Int Arch Occup*  
16 *Environ Health*, 74(1), 1-8. doi: 10.1007/s004200000185
- 17 Oberdorster, G., Oberdorster, E., Oberdorster, J. (2005). Nanotoxicology: an emerging  
18 discipline evolving from studies of ultrafine particles. *Environ Health Perspect*,  
19 113(7), 823-839.
- 20 Ondráček, J., Schwarz, J., Ždímal, V., Andělová, L., Vodička, P., Bízek, V., Tsai, C.J., Chen,  
21 S.C., Smolík, J. (2011). Contribution of the road traffic to air pollution in the Prague  
22 city (busy speedway and suburban crossroads). *Atmospheric Environment*, 45(29),  
23 5090-5100. doi: <http://dx.doi.org/10.1016/j.atmosenv.2011.06.036>
- 24 Pennanen, A.S., Sillanpää, M., Hillamo, R., Quass, U., John, A.C., Branis, M., Hunova, I.,  
25 Meliefste, K., Janssen, N.A., Koskentalo, T., Castano-Vinyals, G., Bouso, L., Chalbot,  
26 M.C., Kavouras, I.G., Salonen, R.O. (2007). Performance of a high-volume cascade  
27 impactor in six European urban environments: mass measurement and chemical  
28 characterization of size-segregated particulate samples. *Sci Total Environ*, 374(2-3),  
29 297-310.
- 30 Pio, C.A. and Harrison, R.M. (1987a). The equilibrium of ammonium chloride aerosol with  
31 gaseous hydrochloric acid and ammonia under tropospheric conditions. *Atmospheric*  
32 *Environment*, 21, 1243-1246.
- 33 Pio, C.A. and Harrison, R.M. (1987b). Vapour Pressure of ammonium chloride aerosol..  
34 Effect of temperature and humidity. *Atmospheric Environment*, 21, 2711-2715.
- 35 Preining, O., Berner, A. (1979). Aerosol Measurements in the Submicron Size Range. *EPA*  
36 *report, EPA-600/2-79-105*. Washington, DC: EPA.
- 37 Querol, X., Alastuey, A., Moreno, T., Viana, M.M., Castillo, S., Pey, J., Rodríguez, S.,  
38 Artiñano, B., Salvador, P., Sánchez, M., Garcia Dos Santos, S., Herce Garraleta, M.D.,  
39 Fernandez-Patier, R., Moreno-Grau, S., Negral, L., Minguillón, M.C., Monfort, E.,  
40 Sanz, M.J., Palomo-Marín, R., Pinilla-Gil, E., Cuevas, E., de la Rosa, J., Sánchez de la  
41 Campa, A. (2008). Spatial and temporal variations in airborne particulate matter  
42 (PM10 and PM2.5) across Spain 1999–2005. *Atmospheric Environment*, 42(17), 3964-  
43 3979. doi: <http://dx.doi.org/10.1016/j.atmosenv.2006.10.071>
- 44 Reche, C., Viana, M., Brines, M., Perez, N., Beddows, D., Alastuey, A., Querol, X. (2015).  
45 Determinants of aerosol lung-deposited surface area variation in an urban  
46 environment. [Research Support, Non-U S Gov't]. *Sci Total Environ*, 517, 38-47.
- 47 Sardar, S.B., Fine, P.M., Mayo, P.R., Sioutas, C. (2005). Size-Fractionated Measurements of  
48 Ambient Ultrafine Particle Chemical Composition in Los Angeles Using the



- 1 NanoMOUDI. *Environmental Science & Technology*, 39(4), 932-944. doi:  
2 10.1021/es049478j
- 3 Schaap, M., Spindler, G., Schulz, M., Acker, K., Maenhaut, W., Berner, A., Wieprecht, W.,  
4 Streit, N., Müller, K., Brüggemann, E., Chi, X., Putaud, J.P., Hitzemberger, R.,  
5 Puxbaum, H., Baltensperger, U., ten Brink, H. (2004). Artefacts in the sampling of  
6 nitrate studied in the "INTERCOMP" campaigns of EUROTRAC-AEROSOL. *Atmos.*  
7 *Environ.*, 38(38), 6487-6496. doi: <http://dx.doi.org/10.1016/j.atmosenv.2004.08.026>
- 8 Schwarz, J., Štefancová, L., Maenhaut, W., Smolík, J., Ždímal, V. (2012). Mass and  
9 chemically speciated size distribution of Prague aerosol using an aerosol dryer--the  
10 influence of air mass origin. *Sci Total Environ*, 437, 348-362. doi:  
11 10.1016/j.scitotenv.2012.07.050
- 12 Seinfeld, J.H., Pandis, S.N. (2006). Atmospheric Chemistry and Physics: From Air Pollution  
13 to Climate Change, 2nd edition. *J. Wiley, New York*.
- 14 Sioutas, C. (2004). Development of New Generation Personal Monitors for Fine Particulate  
15 Matter (PM) and its Metal Content. *NUATRC Research Report No. 2*.
- 16 Smolík, J., Dohányosová, P., Schwarz, J., Ždímal, V., Lazaridis, M. (2008). Characterization  
17 of Indoor and Outdoor Aerosols in a Suburban Area of Prague. *Water Air Soil Pollut:*  
18 *Focus*, 8(1), 35-47. doi: 10.1007/s11267-007-9141-y
- 19 Štefancová, L., Schwarz, J., Maenhaut, W., Chi, X., Smolík, J. (2010). Hygroscopic growth of  
20 atmospheric aerosol sampled in Prague 2008 using humidity controlled inlets.  
21 *Atmospheric Research*, 98(2-4), 237-248. doi:  
22 <http://dx.doi.org/10.1016/j.atmosres.2010.04.009>
- 23 Štefancová, L., Schwarz, J., Mäkelä, T., Hillamo, R., Smolík, J. (2011). Comprehensive  
24 Characterization of Original 10-Stage and 7-Stage Modified Berner Type Impactors.  
25 *Aerosol Science and Technology*, 45(1), 88-100. doi: 10.1080/02786826.2010.524266
- 26 Stelson, A.W., Seinfeld, J.H. (1982). Relative humidity and temperature dependence of the  
27 ammonium nitrate dissociation constant. *Atmospheric Environment (1967)*, 16(5),  
28 983-992. doi: [http://dx.doi.org/10.1016/0004-6981\(82\)90184-6](http://dx.doi.org/10.1016/0004-6981(82)90184-6)
- 29 Talbot, N., Kubelova, L., Makes, O., Cusack, M., Ondracek, J., Vodička, P., Schwarz, J.,  
30 Ždímal, V. (2016). Outdoor and indoor aerosol size, number, mass and compositional  
31 dynamics at an urban background site during warm season. *Atmospheric Environment*,  
32 131, 171-184. doi: <http://dx.doi.org/10.1016/j.atmosenv.2016.01.055>
- 33 Tursic, J., Grgic, I., Berner, A., Skantar, J., Cuhalev, I. (2008). Measurements of size-  
34 segregated emission particles by a sampling system based on the cascade impactor.  
35 [Research Support, Non-U S Gov't]. *Environ Sci Technol*, 42(3), 878-883.
- 36 Vodička, P., Schwarz, J., Ždímal, V. (2013). Analysis of one year's OC/EC data at a Prague  
37 suburban site with 2-h time resolution. *Atmospheric Environment*, 77, 865-872. doi:  
38 <http://dx.doi.org/10.1016/j.atmosenv.2013.06.013>
- 39 Wall, S.M., John, W., Ondo, J.L. (1988). Measurement of aerosol size distributions for nitrate  
40 and major ionic species. *Atmospheric Environment (1967)*, 22(8), 1649-1656. doi:  
41 [http://dx.doi.org/10.1016/0004-6981\(88\)90392-7](http://dx.doi.org/10.1016/0004-6981(88)90392-7)
- 42 Wang, H.-C., John, W. (1988). Characteristics of the Berner Impactor for Sampling Inorganic  
43 Ions. *Aerosol Science and Technology*, 8(2), 157-172. doi:  
44 10.1080/02786828808959179

1  
2

### 3 Supplementary information

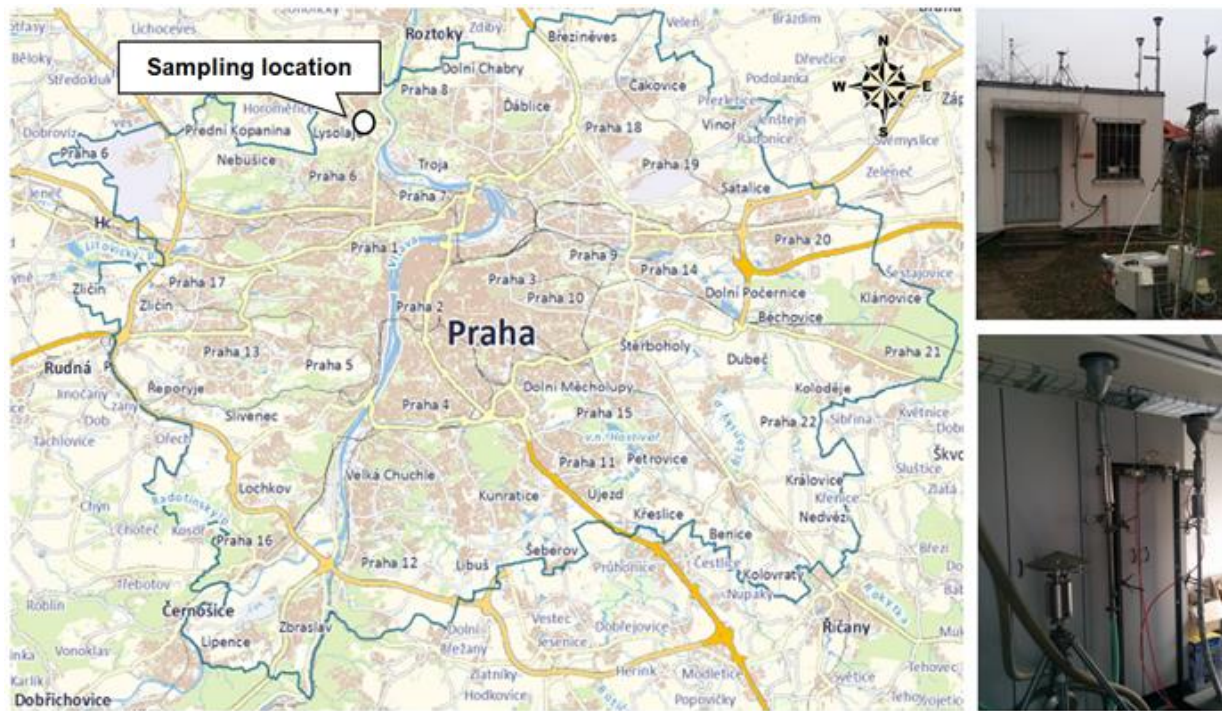

5 *Figure S1. Sampling location in Prague and impactors deployed in outdoor (top right) and*  
6 *indoor environment (bottom right) (IPR, 2015).*

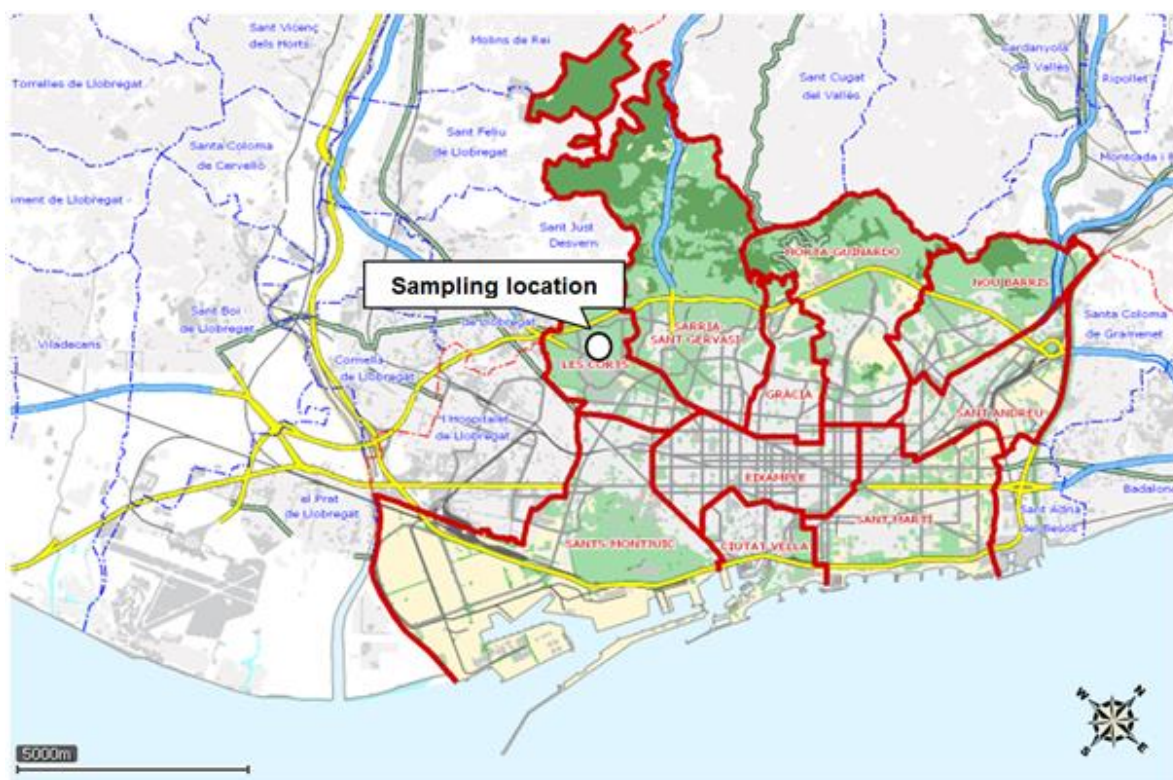

Figure S2. Sampling location in Barcelona (BcnMap, 2015).

*Table S1. Design parameters of the stages from nano-BLPI.*

| Stage number | Lower cut sizes (μm) | Number of nozzles | Nozzle Diameter (mm) |
|--------------|----------------------|-------------------|----------------------|
| 9            | 1.95                 | 1                 | 3.60                 |
| 8            | 1.00                 | 39                | 0.70                 |
| 7            | 0.49                 | 17                | 0.60                 |
| 6            | 0.24                 | 8                 | 0.54                 |
| 5            | 0.095                | 43                | 0.27                 |
| 4            | 0.062                | 88                | 0.25                 |
| 3            | 0.039                | 142               | 0.25                 |
| 2            | 0.024                | 237               | 0.25                 |
| 1            | 0.011                | 408               | 0.25                 |

*Table S2. Average mass concentrations for different ionic species during winter in outdoor and indoor air in Prague.*

| Type of environment | Impactor                         | Mass ionic species ( $\mu\text{g m}^{-3}$ ) |                    |                 |               |               |              |                  |                  |
|---------------------|----------------------------------|---------------------------------------------|--------------------|-----------------|---------------|---------------|--------------|------------------|------------------|
|                     |                                  | $\text{NO}_3^-$                             | $\text{SO}_4^{2-}$ | $\text{NH}_4^+$ | $\text{Cl}^-$ | $\text{Na}^+$ | $\text{K}^+$ | $\text{Mg}^{2+}$ | $\text{Ca}^{2+}$ |
| Outdoor             | BLPI ( $\text{PM}_{14}$ )        | 6.72                                        | 5.72               | 3.78            | 0.40          | 0.22          | 0.20         | 0.03             | 0.14             |
|                     | nano-BLPI ( $\text{PM}_{1.95}$ ) | 5.78                                        | 4.99               | 3.31            | 0.18          | 0.06          | 0.16         | 0.01             | 0.03             |
|                     | nano-Moudi ( $\text{PM}_{10}$ )  | 1.71                                        | 5.12               | 2.06            | 0.19          | 0.25          | 0.20         | 0.01             | 0.06             |
| Indoor              | BLPI ( $\text{PM}_{14}$ )        | 0.49                                        | 2.15               | 0.78            | 0.05          | 0.10          | 0.10         | 0.01             | 0.05             |

|                                 |                      |                      |                      |                      |                      |                      |                      |                      |
|---------------------------------|----------------------|----------------------|----------------------|----------------------|----------------------|----------------------|----------------------|----------------------|
| nano-BLPI (PM <sub>1.95</sub> ) | 0.35                 | 1.93                 | 0.73                 | 0.02                 | 0.05                 | 0.09                 | 0.00                 | 0.02                 |
| nano-Moudi (PM <sub>10</sub> )  | 0.34                 | 1.53                 | 0.53                 | 0.03                 | 0.13                 | 0.08                 | 0.00                 | 0.05                 |
| Blank uncertainty*              | 1.3x10 <sup>-3</sup> | 9.4x10 <sup>-4</sup> | 2.0x10 <sup>-4</sup> | 3.0x10 <sup>-4</sup> | 2.0x10 <sup>-4</sup> | 2.0x10 <sup>-4</sup> | 1.0x10 <sup>-4</sup> | 3.0x10 <sup>-4</sup> |

1 \* Recalculated per 1m<sup>3</sup> of air for BLPI for 72 h sampling.
